1  
2  
3  
4  
5  
6  
7  
8  
9  
10  
11  
12  
13  
14  
15  
16  
17  
18  
19  
20  
21  
22  
23  
24

**PH domain and leucine rich repeat phosphatase 1 (Phlpp1) suppresses parathyroid hormone receptor 1 (Pth1r) expression and signaling during bone growth**

Samantha R. Weaver<sup>1\*</sup>, Earnest L. Taylor<sup>1\*</sup>, Elizabeth L. Zars<sup>1</sup>, Katherine M. Arnold<sup>1</sup>, Elizabeth W. Bradley<sup>2</sup>, Jennifer J. Westendorf<sup>1,3</sup>

1. Department of Orthopedic Surgery, Mayo Clinic, Rochester, MN, USA. 2. Department of Orthopedic Surgery and Stem Cell Institute, University of Minnesota, Minneapolis, MN. 3. Department of Biochemistry and Molecular Biology, Mayo Clinic, Rochester, MN, USA.

\*indicates equal contribution of authors

Corresponding author:  
Jennifer J. Westendorf, PhD  
Mayo Clinic  
200 First Street SW  
Rochester, MN 55905  
Phone: 507-538-5651  
Email: westendorf.jennifer@mayo.edu

**Running Title**

Phlpp1 suppresses Pth1r in chondrocytes

**Disclosures**

The authors declare that they have no disclosures.

25 **ABSTRACT**

26 Endochondral ossification is tightly controlled by a coordinated network of signaling cascades including  
27 parathyroid hormone (PTH). PH domain and leucine rich repeat phosphatase (Phlpp1) affects  
28 endochondral ossification by suppressing chondrocyte proliferation in the growth plate, longitudinal bone  
29 growth, and bone mineralization. As such, Phlpp1<sup>-/-</sup> mice have shorter long bones, thicker growth plates,  
30 and proportionally larger growth plate proliferative zones. The goal of this study was to determine how  
31 Phlpp1 deficiency affects PTH signaling during bone growth. Transcriptomic analysis revealed greater  
32 Pth1r expression and H3K27ac enrichment at the Pth1r promoter in Phlpp1-deficient chondrocytes.  
33 PTH(1-34) enhanced and PTH(7-34) attenuated cell proliferation, cAMP signaling, CREB  
34 phosphorylation, and cell metabolic activity in Phlpp1-inhibited chondrocytes. To understand the role of  
35 Pth1r action in the endochondral phenotypes of Phlpp1-deficient mice, Phlpp1<sup>-/-</sup> mice were injected with  
36 Pth1r ligand PTH(7-34) daily for the first four weeks of life. PTH(7-34) reversed the abnormal growth plate  
37 and long bone growth phenotypes of Phlpp1<sup>-/-</sup> mice but did not rescue deficits in bone mineral density or  
38 trabecular number. These results demonstrate that elevated Pth1r expression and signaling contributes to  
39 increased proliferation in Phlpp1<sup>-/-</sup> chondrocytes and shorter bones in Phlpp1-deficient mice. Our data  
40 reveal a novel molecular relationship between Phlpp1 and Pth1r in chondrocytes during growth plate  
41 development and longitudinal bone growth.

42

43 **Keywords:** Molecular pathways – development, Chondrocyte and cartilage biology, growth plate, PTH/Vit  
44 D/FGF23

## 45 INTRODUCTION

46 During development, long bones lengthen and harden through the process of endochondral ossification<sup>(1)</sup>.  
47 In the epiphyseal growth plate, chondrocytes proliferate and undergo hypertrophy to drive appositional  
48 bone lengthening. Vascularization of the early cartilaginous bone brings osteoblast and osteoclast  
49 precursors which ossify, model, and remodel bone. Most hypertrophic chondrocytes will undergo  
50 apoptosis, but some survive and contribute to the osteogenic pool in bone marrow<sup>(2-4)</sup>. These dynamic  
51 and complex processes are orchestrated by numerous extracellular factors that induce transcriptional  
52 events and intracellular signaling.

53 PH domain and leucine rich repeat phosphatases (Phlpp1 and Phlpp2) control cell proliferation and  
54 survival through posttranslational modification of several intracellular substrates<sup>(5-7)</sup>. Originally identified  
55 as terminators of Akt signaling<sup>(8)</sup>, further work showed Phlpp1/2 regulation of protein kinase C (PKC)<sup>(9,10)</sup>,  
56 ribosomal protein S6 kinase (S6K)<sup>(11)</sup>, and mitogen-activated protein kinase (Mapk/Erk)<sup>(5)</sup>. Additionally,  
57 Phlpp1/2 can translocate to the nucleus to modulate histone acetylation and phosphorylation<sup>(12)</sup>. Phlpp1/2  
58 have been implicated as tumor suppressors<sup>(9,13,14)</sup>, but also regulate metabolic processes<sup>(15)</sup>,  
59 inflammation<sup>(16)</sup>, and tissue regeneration following injury<sup>(17-24)</sup>. Phlpp1 is overexpressed in human  
60 osteoarthritic tissue and Phlpp1 inactivation improves murine post-traumatic osteoarthritis<sup>(17)</sup>. Phlpp1  
61 deletion accelerates chondrocyte maturation in vitro, preserves articular cartilage in vivo, and increases  
62 mobility in mice with post-traumatic osteoarthritis<sup>(17,18)</sup>. In the developing appendicular skeleton, Phlpp1  
63 controls chondrocyte proliferation and bone lengthening<sup>(5)</sup>. Phlpp1-depleted mice have short long bones  
64 and low bone mass<sup>(5)</sup> and Phlpp1-deficient chondrocytes proliferate more and express higher levels of  
65 growth factors such as Fgf18 and growth factor receptors, including Pth1r.

66 Pth1r is a G-protein-copuled receptor for parathyroid hormone (PTH) and parathyroid hormone-related  
67 protein (PTHrP). Dysregulation of signaling from Pth1r is at the root of several genetic diseases and is the  
68 target of bone anabolic therapies<sup>(25)</sup>. Pth1r activates G $\alpha$  subunits to regulate cyclic AMP production<sup>(25)</sup>, as  
69 well as Akt<sup>(26)</sup>, PKC<sup>(27)</sup>, and Erk1/2<sup>(28)</sup> activation. Pth1r is expressed in various musculoskeletal cells,  
70 including mesenchymal stem cells<sup>(29)</sup>, osteocytes<sup>(30)</sup>, osteoblasts<sup>(31,32)</sup>, and chondrocytes<sup>(33,34)</sup>. In the  
71 growth plate, Pth1r activation in proliferating cells inhibits premature hypertrophy and thus is crucial for

72 proper development prenatally and during early life<sup>(1,35)</sup>. PTH peptides (1-34 and 7-34) that bind Pth1r  
73 have been developed for clinical and research use. Both PTH(1-34) and PTH(7-34) cause Pth1r  
74 internalization with identical kinetics. However, only PTH(1-34) activates adenylyl cyclase and  
75 phospholipase C (PLC)<sup>(36)</sup>. When injected intermittently, PTH(1-34) increases bone mass and bone  
76 formation, and reduces fracture risk<sup>(37)</sup>. By contrast, continuous infusion of PTH(1-34) has catabolic  
77 effects on bone<sup>(38)</sup>. PTH(7-34) does not appear to have any effects on bone when administered alone<sup>(39)</sup>.  
78 We previously showed that Pth1r mRNA levels were elevated in Phlpp1 depleted chondrocytes<sup>(5)</sup>. Here,  
79 we demonstrate that Phlpp1 regulates Pth1r transcription and signaling and show how these pathways  
80 cooperate to regulate endochondral ossification in mice. PTH(7-34) administration from birth through four  
81 weeks of age reversed the abnormal bone growth phenotype characteristic of Phlpp1<sup>-/-</sup> mice. In vitro,  
82 PTH(7-34) reversed the increases in cell proliferation, CREB phosphorylation, metabolic activity, and  
83 cAMP signaling evident in Phlpp1<sup>-/-</sup> chondrocytes. Taken together, our results demonstrate that Phlpp1  
84 suppresses Pth1r expression and signaling in chondrocytes to regulate endochondral ossification.

85

## 86 MATERIALS AND METHODS

87 *In vitro Phlpp inhibitor experiments:* For experiments involving small-molecule Phlpp inhibitors (Phlpp $\hat{i}$ ),  
88 cells were treated with 25 $\mu$ M NSC117079, 25 $\mu$ M NSC45586 (Glaxo Laboratories), or vehicle (0.0005%  
89 DMSO) for the indicated time.

90 *In vitro PTH experiments:* Primary WT or Phlpp1<sup>-/-</sup> IMCs were plated and allowed to adhere overnight.  
91 Medium was replaced with DMEM containing either PTH(1-34), PTH(7-34) (Bachem), or vehicle (0.1%  
92 BSA in PBS) at the concentrations indicated.

93 *ATDC5 cell culture:* ATDC5 cells were seeded at a density of 5 x 10<sup>5</sup> cells/well in a six-well plate and  
94 incubated overnight to allow for cell adhesion in DMEM supplemented with 10% FBS and 100 units/mL  
95 penicillin, 100  $\mu$ g/mL streptomycin, and 0.25  $\mu$ g/mL Amphotericin B (1% antibiotic/antimycotic; Gibco  
96 15240112). Phlpp $\hat{i}$  treatments were added as indicated. Each experiment included at least three technical  
97 replicates and was repeated at least three times. Results from a representative experiment are shown.

98 Immature chondrocyte (IMC) cell culture: Primary immature chondrocytes (IMCs) were collected from 5-  
99 day-old WT or Phlpp1<sup>-/-</sup> mice as previously described<sup>(5,40)</sup>. To evaluate mRNA and proteins, IMCs were  
100 isolated from cartilage with an overnight digestion in 0.5 mg/mL collagenase in serum-free culture  
101 medium, washed in PBS, and lysed as described below. When cells required treatment in culture,  
102 chondrocytes were plated in monolayer at a seeding density of  $5 \times 10^5$  cells/well in a six-well plate and  
103 cultured in DMEM supplemented with 2% FBS and 1% antibiotic/antimycotic. For micromass  
104 experiments, 10  $\mu$ L drops of IMC suspensions ( $2 \times 10^7$  cells/mL) were plated in DMEM. Three  
105 micromasses were plated in each well of a 6-well plate. After 1 hour, micromasses were covered with 2  
106 mL DMEM + 2% FBS + 1% antibiotic/antimycotic and allowed to grow for 3 days, after which time the  
107 culture medium was changed to 2% FBS + 1% antibiotic/antimycotic + 1x Insulin/Transferrin/Selenium  
108 (ITS) + 0.05 mg/mL ascorbic acid + 10 mM  $\beta$ -glycerophosphate + respective treatment<sup>(5,41)</sup>. Littermates  
109 were pooled according to genotype for each experiment. Each experiment was repeated at least three  
110 times and represents at least n=3 biological replicates. Data from a representative experiment are shown.

111 Transcriptional inhibition: Primary chondrocytes were plated and allowed to adhere overnight as  
112 described above. Actinomycin D (5 $\mu$ M, Gibco 11805017) was added for six hours and then replaced with  
113 medium containing Phlpp1 or vehicle for 24 hours. Cells were collected for RNA or protein extraction.

114 RNA isolation and real-time PCR: Total RNA was extracted from cell lines and primary chondrocytes  
115 using TRIzol (Invitrogen) and chloroform and 2 $\mu$ g was reverse transcribed using the iScript cDNA  
116 Synthesis Kit (Bio-Rad). Resulting cDNAs were used to assay gene expression via real-time PCR using  
117 the following gene-specific primers: Pth1r (5'-ACTTAGGCCGTTTCCTGTCC-3', 5'-  
118 GAGGAGCTGACTCAGGTTGG-3'), Ywhaz (5'-GCCCTAAATGGTCTGTCACC-3', 5'-  
119 GCTTTGGGTGTGACTTAGCC-3'). Fold changes in gene expression were calculated using the  $2^{-\Delta\Delta Ct}$   
120 method relative to control after normalization of gene-specific Ct values to Ywhaz Ct values<sup>(42)</sup>.

121 Western blotting: Cell lysates were collected in a buffered SDS solution (0.1% glycerol, 0.01% SDS, 0.1M  
122 Tris, pH 6.8) on ice. Total protein concentrations were obtained using the Bio-Rad DC Assay (Bio-Rad).  
123 Proteins (20 $\mu$ g) were resolved by SDS-PAGE and transferred to a polyvinylidene difluoride membrane.  
124 Western blotting was performed with antibodies (1:1000 dilution) for Phlpp1 (Sigma 07-1341), Pth1r

125 (Sigma SAB4502493), H3pS10 (Abcam ab5176), H3K9ac (Abcam ab10812), H3K27ac (Abcam ab4729),  
126 H3pS28 (Cell Signaling Technology 9713S), H3K9K14ac (Cell Signaling Technology 9677S), total H3  
127 (Abcam ab1791), pCREB-S133 (Cell Signaling Technology 9198S), total CREB (Cell Signaling  
128 Technology 4820), and Actin (Sigma A4700) and corresponding secondary antibodies conjugated to  
129 horseradish peroxidase (HRP) (Cell Signaling Technology). Antibody binding was detected with the  
130 Supersignal West Femto Chemiluminescent Substrate (Pierce Technology, Rockford, IL).

131 Live Cell Imaging: Primary chondrocytes ( $5 \times 10^3$  cells/well) were allowed to adhere in monolayer in a 48-  
132 well plate and cultured overnight. Medium was replaced with DMEM containing either 10nM PTH(1-34),  
133 10nM PTH(7-34), or vehicle (0.1% BSA in PBS). Cell confluency was detected in real-time with the  
134 IncuCyte S3 Live Cell Analysis System (Roche Applied Sciences, Indianapolis, IN), with four captures per  
135 well every hour for 48 hours.

136 Cyclic AMP assay: WT and Phlpp1<sup>-/-</sup> IMCs were allowed to attach to a 6-well plate overnight and then  
137 treated with 100nM PTH(1-34) or 100nM PTH(7-34) for 15 minutes. Cyclic AMP (cAMP) concentrations in  
138 IMC protein extracts (100  $\mu$ g) were determined by ELISA (Cayman Chemical 581001).

139 Chondrocyte metabolic activity assay: Primary chondrocytes ( $1 \times 10^3$  cells/well) were cultured in monolayer  
140 in 96-well flat-well plates for 24 hours with 10nM PTH(1-34) or 10nM PTH(7-34). CellTiter 96® Aqueous  
141 One Solution Cell Proliferation Assays (Promega) were performed according to manufacturer  
142 specifications. Briefly, 20  $\mu$ L of a reagent containing 3-(4,5-dimethylthiazol-2-yl)-5-(3-carboxymethoxy-  
143 phenyl)-2-(4-sulfophenyl)-2H-tetrazolium (MTS) was added to each well for 24 h at 37°C.  
144 Spectrophotometer readings were taken at OD490.

145 Micromass staining with Alcian Blue: Micromasses of WT or Phlpp1<sup>-/-</sup> IMCs were plated as described  
146 above and incubated for three days in DMEM + 2% FBS. Medium was replaced with DMEM containing 1x  
147 ITS, 0.05 mg/mL ascorbic acid, and 10 mM  $\beta$ -glycerophosphate in the presence of 10nM PTH(1-34),  
148 10nM PTH(7-34) for 9 days, with media changes every three days. Cells were washed with PBS, and  
149 0.5% Alcian Blue (Sigma A5268) was applied for 2 hours.

150 *Histology and Immunohistochemistry / In Situ Hybridization*: Right tibiae were decalcified for 14 days in  
151 15% EDTA, dehydrated, and embedded in paraffin for sectioning. Sections (5  $\mu\text{m}$  thick) were stained with  
152 Safranin O (Sigma S2255) and Fast Green (Sigma F7252)<sup>(5)</sup> and chosen for analysis based on  
153 anatomical landmarks in the bone. Cross-sectional areas of the proliferative and hypertrophic zones in  
154 the proximal tibia growth plate were found in MatLab (version R2019b)<sup>(43)</sup>. A polygon was drawn around  
155 the respective zone and a binary image was formed where pixels inside the region of interest were set to  
156 one, and all other pixels were set to zero. The area of the binary image was calculated using the *bwarea*  
157 command and scaled to  $3.45 \times 10^{-6} \text{ mm}^2$  per pixel. Immunohistochemistry was performed with antibodies  
158 diluted in 1% bovine serum albumin in tris-buffered saline directed to Pth1r (1:50 dilution, Sigma  
159 SAB4502493) or with a nonspecific IgG (control). Chromagens were detected with a polyvalent  
160 secondary HRP kit (Abcam, ab93697) and 3,3'-diaminobenzidine (DAB) (Sigma-Aldrich, D3939). In situ  
161 hybridization was performed using the RNAScope<sup>®</sup> 2.5 HD Assay - Brown (ACD Biotechne). Briefly,  
162 slides were deparaffinized and epitope retrieval was achieved using a Custom Pretreatment Reagent  
163 provided by the manufacturer. Pth1r (ACD Biotechne 426191) and Col10a1 (ACD Biotechne 426181)  
164 riboprobes were hybridized to the tissue for two hours and detected using RNAScope<sup>®</sup> 2.5 HD Assay  
165 detection reagents. DapB (ACD Biotechne 310043) was the negative control. Imaging was completed  
166 using a Zeiss LSM 900 Confocal Microscope.

167 *Chromatin Immunoprecipitation (ChIP) Sequencing and PCR*: Primary chondrocytes were cultured in  
168 monolayer 10cm dishes for 24 hours. Cells were treated with 25 $\mu\text{M}$  NSC117079 or vehicle for 24 hours  
169 and then prepared for ChIP-Seq ( $2 \times 10^7$  cells / sample). ChIP-seq was performed as previously  
170 described<sup>(41)</sup>, utilizing the anti-H3K27ac antibody (CST 8173BC (D5E4)). Libraries were prepared from  
171 10ng DNA using the ThruPLEX DNA-seq Kit V2 (Rubicon Genomics, Ann Arbor, MI) and sequenced to  
172 51 base pairs from both ends on an Illumina HiSeq 4000 instrument at the Mayo Clinic Medical Genome  
173 Facility Sequencing Core. ChIP-qPCR was performed as previously described utilizing 2  $\mu\text{g}$  of anti-  
174 H3K27ac (Abcam ab4729) or YY1 (Active Motif 61780)<sup>(41)</sup>. Primers used for ChIP-qPCR were: Pth1r  
175 Promoter (5'-CCGCAGACTGACACGGAGAC-3', 5'-CGACATTCATGGCAAGGCGG-3'), -1.47kb (5'-  
176 TGTGGAGTATCACACACTGCG-3', 5'-TTGGGTAAAGCGGTCCCATT-3'). The -1.47kb primer is labeled

177 to indicate the distance from the Pth1r promoter primer. The Pth1r promoter and upstream site were  
178 identified using Ensembl Genome Browser.

179 PTH injections to mice: All mice were maintained in an accredited facility with 12-h light/dark cycle and  
180 supplied with food (PicoLab<sup>®</sup> Rodent Diet 20 5058, LabDiet) *ad libitum*<sup>(44)</sup>. All animal research was  
181 performed according to National Institute of Health and the Institute of Laboratory Animal Resources,  
182 National Research Council guidelines and the Mayo Clinic Institutional Animal Care and Use Committee  
183 approved all animal studies. Animals for these experiments were generated by crossing Phlpp1<sup>+/-</sup> males  
184 and females. Beginning on the day after birth, entire litters of pups were injected daily with 100 µg/kg  
185 body weight/day PTH(7-34) or vehicle (0.1% BSA in PBS) through four weeks of age<sup>(45)</sup>. Animals were  
186 genotyped at three weeks of age<sup>(5)</sup>. Sample size was determined based on a power calculation that  
187 provided an 80% chance of detecting a significant difference (P<0.05). Final male group sizes were:  
188 WT+Vehicle (n=5), WT+PTH(7-34) (n=5), HET+Vehicle (n=9), HET+PTH(7-34) (n=6), Phlpp1<sup>-/-</sup>+Vehicle  
189 (n=4), and Phlpp1<sup>-/-</sup>+PTH(7-34) (n=6). Final female group sizes were: WT+Vehicle (n=7), WT+PTH(7-34)  
190 (n=6), HET+Vehicle (n=8), HET+PTH(7-34) (n=7), Phlpp1<sup>-/-</sup>+Vehicle (n=7), and Phlpp1<sup>-/-</sup>+PTH(7-34)  
191 (n=8). At four weeks old, mice were euthanized and limbs were collected, fixed overnight in 10% neutral  
192 buffered formalin, and stored in 70% ethanol until further analysis.

193 X-ray Imaging: Radiographs of hind limbs were collected using a Faxitron X-ray imaging cabinet (Faxitron  
194 Bioptics, Tuscon, AZ). Limb length was measured on radiographs using ImageJ (1.52a) software.

195 MicroCT: Micro-CT imaging of the femur and tibiae were performed using a SkyScan 1276 scanner  
196 (Bruker, Kontich, Belgium). Bones were fixed in 10% NBF before storage in 70% ethanol. Scans were  
197 performed at 55kV, 200 µA, 10 µm pixel resolution, 0.4° rotation steps for 360°, 4 frames average  
198 imaging with a 0.25mm A1 filter. The acquired scans were reconstructed using the Skyscan NRecon  
199 software with beam hardening and post-alignment correction. Trabecular and cortical analyses of the  
200 femur were performed using Bruker CtAN software. The datasets were oriented in 3D to vertically align  
201 the longitudinal axis of each femur. As the bones were different lengths, a region of interest (ROI) for  
202 trabecular bone was defined as 5% the length of each bone, beginning 8% bone's-length distance away  
203 from the distal growth plate. A gray-value threshold of 70 was applied to trabecular segmentations.



204 Quantified outcomes were bone volume / total volume (BV/TV), trabecular thickness (TbTh), trabecular  
205 number (TbN), trabecular spacing (TbSp), and bone mineral density (BMD)<sup>(46)</sup>. For cortical bone  
206 analyses, the ROI was defined as 5% of total femur length beginning at the femoral midpoint. Quantified  
207 outcomes for cortical bone were tissue mineral density (TMD), cortical thickness (CTh), total tissue cross-  
208 sectional area (TtAr), cortical bone area (CtAr), and cortical area fraction (CtAr/TtAr)<sup>(46)</sup>. Semi-automatic  
209 segmentation of the proximal tibial growth plate was performed using 3D Slicer and a 3D region-growing  
210 method<sup>(47)</sup> as previously described<sup>(48)</sup>. For one image slice, seeds were placed in the growth plate, bone,  
211 and empty space. This was repeated approximately 10 times in both the coronal and sagittal planes to  
212 define the segments in 3D. The “grow from seeds” feature was then applied to map the input image to  
213 user-specified segments. “Joint smoothing” was used on the resulting segmentation to preserve segment  
214 interfaces while removing noise. The growth plate segment was exported as a 3D patch object for  
215 processing in MatLab<sup>(43)</sup>. In MatLab, thickness measurements were taken by applying a query grid with 50  
216 micron spacing, and sampling the z values of the patch object at the query points, resulting in  
217 approximately 3500 measurements across the growth plate. From these values, thickness distribution  
218 was plotted as a color map onto the patch object.

219 *Plasma and urine biochemical analyses:* At four weeks of age, WT and Phlpp1<sup>-/-</sup> mice were euthanized.  
220 Groups analyzed were: WT male (n=7), WT female (n=7), Phlpp1<sup>-/-</sup> male (n=8), Phlpp1<sup>-/-</sup> female (n=8).  
221 Whole blood was collected into EDTA-treated tubes (BD Biosciences 365974) and centrifuged for 10  
222 minutes at 1,500 x g at 4°C to isolate plasma. Spot urine samples were collected immediately prior to  
223 euthanasia. Plasma intact PTH(1-84) was measured with an ELISA kit (Immutopics Inc., San Clemente,  
224 CA, USA). Urine creatinine and cAMP levels were measured via ELISA (Enzo Life Sciences,  
225 Farmingdale, NY, USA and Cayman Chemical, Ann Arbor, MI, USA). Urine was diluted 1:50 to fit within  
226 the standard curve of the creatinine kit and 1:300 for the cAMP kit.

227 *BrdU injections to mice and immunohistochemical analysis:* Beginning on postnatal day 1 (P1), entire  
228 litters of pups from Phlpp1<sup>+/-</sup> breeding pairs were injected with either 100 µg/kg body weight/day PTH(7-  
229 34) or vehicle (0.1% BSA in PBS) daily through P5. Males and females were combined because no sex  
230 differences were observed in earlier studies. The final group sizes were: WT+Vehicle (n=6), WT+PTH(7-

231 34) ( $n=5$ ), Phlpp1<sup>-/-</sup>+Vehicle ( $n=6$ ), Phlpp1<sup>-/-</sup>+PTH(7-34) ( $n=8$ ). On P5, pups were injected with 100  $\mu$ L /  
232 100 g body weight BrdU labeling reagent (Invitrogen 00-0103). Two hours later, pups were euthanized  
233 and hind limbs were collected, decalcified for 7 days in 15% EDTA, and processed for histology as  
234 described above. BrdU-positive cells were identified using the BrdU IHC kit (Millipore 2760). A  
235 representative area was chosen in the proximal tibia growth plate as described<sup>(49)</sup>, and the number of  
236 BrdU-positive cells per total cell number was calculated.

237 Statistical analysis: Statistics were performed in Prism GraphPad (Version 8) using Student's t-test, one-  
238 way ANOVA, or two-way ANOVA as appropriate with the necessary post-hoc tests for multiple  
239 comparisons. Data are depicted as individual points with SD bars ( $n=3$ ) or boxplots showing the median,  
240 interquartile distance, and min/max values ( $n>3$ ).

241

## 242 RESULTS

243 Phlpp1 inhibition increases Pth1r expression in chondrocytes: We previously reported that Pth1r mRNA  
244 levels are elevated in Phlpp1<sup>-/-</sup> chondrocytes<sup>(5)</sup>. Given the important role of both Phlpp1 and Pth1r in  
245 endochondral bone formation, we sought to validate Pth1r expression changes in Phlpp1-inactivated  
246 cells. Phlpp inhibitors NSC117079 and NSC45586 increased Pth1r mRNA and protein expression in  
247 ATDC5 cells (**Figs 1A,B; Supp Fig 1A**) and IMCs (**Figs 1C,D; Supp Fig 1B**) within 24 hours. Elevated  
248 Pth1r expression was also confirmed by RT-PCR, immunoblotting, and immunohistochemistry in Phlpp1<sup>-/-</sup>  
249 compared to WT mice (**Figs 1E-H; Supp Fig 1C**). In situ staining for Pth1r was more intense in the  
250 proximal tibial growth plate of Phlpp1<sup>-/-</sup> mice than WT mice at both the RNA and protein levels (**Fig 1G,H;**  
251 **Supp Fig 2A**). Thus, Phlpp1 inhibition rapidly elevates Pth1r expression in vitro and in vivo.

252

253 Phlpp1 regulates Pth1r through transcription: We next identified mechanisms by which Phlpp1  
254 inactivation increases Pth1r levels. Phlpp1 is known to modulate histone 3 (H3) acetylation and  
255 phosphorylation<sup>(12,50)</sup>. Phlpp inhibitors NSC117079 and NSC45586 increased phosphorylation (p) of  
256 H3S10 (H3pS10) as well as acetylation (ac) of H3K9 and H3K27 in primary IMCs, but not H3pS28 or

257 H3K9K14ac (**Fig 2A; Supp Fig 1D-H**). Similar results were observed in *Phlpp1*<sup>-/-</sup> IMCs (**Fig 2A; Supp Fig**  
258 **1I-M**). ChIP-seq revealed several H3K27ac-enriched regions in control and NSC117079-treated cells.  
259 The abundance of H3K27ac was greater within the *Pth1r* promoter in IMCs treated with the Phlpp  
260 inhibitor NSC117079 (**Fig 2B**). When compared to publicly available datasets, H3K27ac peaks are similar  
261 to those found on embryonic limbs (**Supp Fig 3**)<sup>(51)</sup>. ChIP-PCR of chromatin from IMCs treated with  
262 NSC117079 and NSC45586 for 24 hours verified robust enrichment of H3K27ac in the *Pth1r* promoter of  
263 IMCs (**Fig 2C**). *Phlpp1*<sup>-/-</sup> IMCs also had greater basal enrichment of H3K27ac in the *Pth1r* promoter  
264 compared to WT IMCs (**Fig 2D**). The RNA polymerase inhibitor, actinomycin D, prevented the increase in  
265 *Pth1r* mRNA and protein levels, indicating transcriptional regulation (**Fig 2F; Supp Fig 1N**). A search of  
266 two databases identified binding sites for over 70 transcription factors in the region of the *Pth1r* promoter  
267 that was hyperacetylated after Phlpp1 inhibition (**Supp Table 1**). The transcription factor Ying Yang 1  
268 (YY1) was chosen for further evaluation because it was present in both databases, had multiple potential  
269 binding sites in the H3K27ac-enriched peak of the *Pth1r* promoter, and was detectable in primary  
270 chondrocytes via qPCR (data not shown). Primary chondrocytes treated with the Phlpp inhibitor  
271 NSC117079 for 30 minutes had increased binding of YY1 in the *Pth1r* promoter (**Fig 2F**). Together, these  
272 data demonstrate that Phlpp inactivation increases transcription of *Pth1r*.

273 *PTH(7-34) reverses short limb length in Phlpp1*<sup>-/-</sup> mice: *Phlpp1* knockout mice have shorter long bones  
274 than WT littermates<sup>(5)</sup> but similar plasma PTH and urine cAMP concentrations (**Supp Fig 4**). To determine  
275 the effect of *Pth1r* signaling on Phlpp1-mediated long bone growth, whole litters of pups from *Phlpp1*<sup>+/-</sup>  
276 male and female pairs were injected daily with vehicle or PTH(7-34), which induces receptor  
277 internalization but not signaling, from the day of birth through four weeks of age. As expected, *Phlpp1*<sup>-/-</sup>  
278 mice injected with vehicle had shorter tibiae (**Fig 3A,C,E,G; Supp Fig 5E**) and femurs (**Fig 3B,D,F,H;**  
279 **Supp Fig 5F**), with *Phlpp1*<sup>+/-</sup> (HET) showing an intermediate phenotype between WT and *Phlpp1*<sup>-/-</sup> mice  
280 (**Supp Fig 5A,B,E,F**). *Phlpp1*<sup>-/-</sup> mice also had shorter tail-to-snout body length (**Supp Fig 5C,G; Supp Fig**  
281 **6A,C**) and lower body weight (**Supp Figure 5D,H; Supp Fig 6B,D**) than WT mice. PTH(7-34) did not alter  
282 bone growth in WT mice but rescued the short femur and tibia lengths (**Fig 3; Supp Figure 5**) as well as  
283 in overall body length and body weight (**Supp Figure 5, 6**) in *Phlpp1*<sup>-/-</sup> mice. As males and females  
284 showed nearly identical results, male mice were used for all subsequent analyses.

285 *Pth1r and Phlpp1 coordinate to regulate growth plate size*: Chondrocyte hypertrophy in the epiphyseal  
286 growth plate determines longitudinal bone growth. Four-week-old Phlpp1<sup>-/-</sup> mice have an increased cell  
287 number in the proliferative zone of the growth plate, suggesting delayed entry into hypertrophy and  
288 therefore shorter bone length<sup>(5)</sup>. 3D rendering of the proximal tibial growth plate<sup>(48)</sup> confirmed that Phlpp1<sup>-/-</sup>  
289 mice had thicker growth plates than WT littermates (**Fig 4A,B**). The difference in growth plate thickness  
290 was due to an increase in the size of the proliferative zone, which was attenuated by the administration of  
291 PTH(7-34) to Phlpp1<sup>-/-</sup> mice (**Fig 4C,D; Supp Fig 2B**). Treatment with PTH(7-34) did not have any effect  
292 on the proliferative zone of WT mice. The hypertrophic zone area was not statistically different in any of  
293 the groups (**Fig 4C,D**) and there was no difference in the expression of Col10a1 as detected by in situ  
294 hybridization (**Fig 4E; Supp Fig 2C**). To more directly assess the effects of Phlpp1 deletion and PTH(7-  
295 34) administration on cell proliferation, WT and Phlpp1<sup>-/-</sup> mice were injected with vehicle or PTH(7-34) at  
296 the same doses as the 4-week-old mice from postnatal day 1 (P1) daily through P5. BrdU-positive cells  
297 were labeled and quantified in the proximal tibial growth plate. As previously reported, Phlpp1<sup>-/-</sup> P5 mice  
298 had a greater number of BrdU+ cells compared to WT mice. PTH(7-34) administration reversed the effect  
299 of Phlpp1 deletion, reducing the number of BrdU+ cells in the proximal tibial growth plate to levels similar  
300 to WT mice (**Fig 4F,G; Supp Fig 2D**).

301 *Daily administration of PTH(7-34) does not affect bone mass*: Given the effects of Phlpp1 and Pth1r  
302 modulation on bone length, it was pertinent to examine bone mass. Consistent with previous studies<sup>(5)</sup>,  
303 Phlpp1<sup>-/-</sup> mice had lower bone mass than WT littermates. Specifically, Phlpp1<sup>-/-</sup> mice had lower bone  
304 volume / tissue volume (**Fig 5A,B**), fewer trabeculae (**Fig 5C**), and lower trabecular bone mineral density  
305 (**Fig 5D**) compared to WT mice. In addition, Phlpp1<sup>-/-</sup> mice had lower cortical tissue mineral density (**Fig**  
306 **5E**) and thinner cortical bone (**Fig 5F**). The administration of PTH(7-34) did not affect trabecular bone  
307 volume / tissue volume (**Fig 5B**), trabecular number (**Fig 5C**), trabecular bone mineral density (**Fig 5D**), or  
308 cortical tissue mineral density (**Fig 5E**) in either WT or Phlpp1<sup>-/-</sup> mice. However, daily PTH(7-34)  
309 administration did reverse the effect of Phlpp1 deletion on cortical thickness (**Fig 5F**). Total tissue cross-  
310 sectional area was reduced in Phlpp1<sup>-/-</sup> mice compared to WT mice, which was reversed by PTH(7-34)  
311 administration (**Fig 5G**), as would be expected given the Phlpp1<sup>-/-</sup> mice have smaller appendicular bones.

312 However, the cortical area fraction was unaffected by Phlpp1 deletion or PTH(7-34) modulation (**Fig 5H**).  
313 Trabecular spacing and trabecular thickness were not affected (data not shown).

314 *Phlpp1 inhibition elevates Pth1r signaling cascades*: Having established that Phlpp1 regulates Pth1r  
315 expression through transcription (**Fig 2**) and controls chondrocyte proliferation in vivo (**Fig 3**), we tested  
316 the effects of Phlpp inactivation on known Pth1r signaling targets in vitro. PTH(1-34) was included in  
317 these experiment as a positive control. Endogenous PTH and PTH(1-34) bind to Pth1r and stimulate  
318 intracellular cAMP, in turn activating PKA and inducing phosphorylation of cAMP-response element-  
319 binding protein (CREB) at S133<sup>(52,53)</sup>. IMCs isolated from Phlpp1<sup>-/-</sup> mice had greater baseline levels of  
320 Pth1r and pS133-CREB (**Fig 6A; Supp Fig 10-Q**). PTH(1-34) enhanced and PTH(7-34) reduced Pth1r  
321 and pS133-CREB. Phlpp1<sup>-/-</sup> IMCs had similar basal cAMP concentrations as WT IMCs, but were more  
322 responsive to PTH(1-34) than WT IMCs. PTH(7-34) had no effect (**Fig 6B**). Confluency of Phlpp1<sup>-/-</sup>  
323 chondrocytes increased more rapidly over 48 hours than that of WT monolayer cultures. PTH(1-34)  
324 further enhanced confluency of both WT and Phlpp1<sup>-/-</sup> chondrocyte monolayer cultures, while PTH(7-34)  
325 attenuated Phlpp1<sup>-/-</sup> growth to WT rates (**Fig 6C**). While Phlpp1<sup>-/-</sup> chondrocytes had only numerically  
326 higher MTS activity compared to WT, treatment with PTH(1-34) further enhanced the effects of Phlpp1<sup>-/-</sup>,  
327 while PTH(7-34) reversed the effects of Phlpp1<sup>-/-</sup> on MTS activity (**Fig 6D**). Similar to previous results<sup>(5)</sup>,  
328 Phlpp1<sup>-/-</sup> micromasses have more intense staining of Alcian Blue compared to WT littermates. PTH(1-34)  
329 further intensified Alcian Blue staining in Phlpp1<sup>-/-</sup> chondrocytes. By contrast, treating Phlpp1<sup>-/-</sup> cells with  
330 PTH(7-34) diminished the intensity of Alcian Blue stain to WT levels (**Fig 6E**). Together, these data show  
331 that Phlpp1<sup>-/-</sup> chondrocytes express more Pth1r and are more responsive to PTH ligands.

## 332 **DISCUSSION**

333 Our results show that greater Pth1r expression and signaling in Phlpp1<sup>-/-</sup> chondrocytes contributes to  
334 growth delays in long bones. Administration of PTH(7-34) for the first four weeks of life reverses the short  
335 limb phenotype in the appendicular skeleton of Phlpp1<sup>-/-</sup> mice. Specifically, PTH(7-34) attenuates the  
336 thicker growth plates and large proliferative zones in the epiphyseal growth plate of Phlpp1<sup>-/-</sup> mice.  
337 Confirming previous results<sup>(5)</sup>, Phlpp1<sup>-/-</sup> mice have lower bone mineral density than WT mice, and PTH(7-  
338 34) has no effect on bone mass or microarchitecture. Regulation of Pth1r by Phlpp1 occurs at the

339 transcriptional level, as H3K27 acetylation is increased at the Pth1r promoter in the Phlpp1-depleted  
340 chondrocytes and blocking transcription prevents the increase in Pth1r mRNA and protein levels  
341 associated with Phlpp1 inhibition. The transcription factor YY1 may contribute to the increased  
342 transcription of Pth1r in Phlpp1 inactivated cells. Additionally, Phlpp1 inhibition increases phosphorylation  
343 of Pth1r effector CREB and increases cell proliferation, each of which can be enhanced with Pth1r  
344 agonism and attenuated with Pth1r antagonism. Taken together, these results demonstrate that Phlpp1  
345 inhibition increases Pth1r expression and signaling to stunt endochondral ossification.

346 Pth1r is critical for proper growth plate development. In human populations, both inactivating<sup>(54)</sup> and  
347 activating<sup>(55,56)</sup> mutations of Pth1r are associated with shortened limbs and abnormal bone mineralization.  
348 Mice with a chondrocyte-specific deletion for Pth1r have reduced chondrocyte proliferation, accelerated  
349 hypertrophic differentiation, and premature growth plate closure, ultimately resulting in short stature<sup>(35,57)</sup>.  
350 Our results show that Pth1r is overexpressed in Phlpp1<sup>-/-</sup> chondrocytes. In previous studies, Pth1r  
351 overexpression in chondrocytes delayed mineralization and decelerated the conversion of chondrocytes  
352 from proliferative to hypertrophic states, resulting in shorter limbs<sup>(58)</sup>. Although less dramatic, Phlpp1<sup>-/-</sup>  
353 mice demonstrate a similar phenotype in which bone mineral density is reduced, and the proliferative  
354 zone of the growth plate is larger than WT mice.

355 The altered growth plate phenotype in Phlpp1<sup>-/-</sup> mice results in shorter femurs and tibiae and this is  
356 reversed by administration of PTH(7-34). Our results indicate that Phlpp1-deficiency promotes  
357 proliferation through Pth1r signaling and that PTH(7-34) suppression of Pth1r slows proliferation and  
358 promotes bone lengthening. Injecting mice with 100 µg/kg body weight/day PTH(7-34) did not fully rescue  
359 bone length in every parameter measured. For example, both male and female Phlpp1<sup>-/-</sup> mice injected  
360 with PTH(7-34) had longer tibiae than vehicle-injected Phlpp1<sup>-/-</sup> mice, but the length was not completely  
361 recovered to the control groups. There could be several explanations for these findings. PTH(7-34) was  
362 only injected postnatally. PTH signaling is active in utero<sup>(59)</sup> and it is possible that a basal level of elevated  
363 Pth1r signaling had already occurred in Phlpp1<sup>-/-</sup> mice such that it was only partially attenuated by  
364 postnatal administration of PTH(7-34). Other doses and timing schemes of PTH(7-34) administration  
365 could be further pursued to determine if there is a more complete rescue. Although our results have

366 focused primarily on chondrocyte dynamics in the growth plate, various hormones, cytokines, and  
367 paracrine growth factors work in concert with PTH signaling to determine endochondral ossification and  
368 should be further examined in *Phlpp1*<sup>-/-</sup> mice<sup>(60)</sup>.

369 There were no apparent effects of PTH(7-34) on bone mineral density in either WT or *Phlpp1*<sup>-/-</sup> mice, with  
370 the notable exception of reversing thin cortical bone in *Phlpp1*<sup>-/-</sup> mice. PTH signaling plays a significant  
371 role in bone mineralization<sup>(61)</sup> and perturbations in signaling to either enhance or decrease PTH signaling  
372 can have profound effects on bone<sup>(62)</sup>. PTH(1-34) increases bone mass when administered intermittently  
373 during development and in more mature models<sup>(37,45,63-65)</sup>. Teriparatide (PTH(1-34)) and abaloparatide  
374 (PTHrP(1-34)) are widely utilized osteoanabolic treatments that rely on *Pth1r* signaling for bone  
375 accrual<sup>(65)</sup>. Although *Phlpp1*<sup>-/-</sup> mice have increased *Pth1r* expression and signaling, they have lower bone  
376 mineral density<sup>(5)</sup>. This is perhaps unsurprising, as constitutively overexpressing *Pth1r* delays bone  
377 mineralization during development<sup>(58)</sup>. *Phlpp1* deletion specifically in osteoclasts increases bone  
378 mineralization<sup>(7)</sup> while germline deletion of *Phlpp1* decreases bone mass<sup>(5)</sup>, demonstrating that *Phlpp1*  
379 effects are distinct in different musculoskeletal cell types. The fact that PTH(7-34) was unable to rescue  
380 low bone mineralization in *Phlpp1*<sup>-/-</sup> mice suggests that *Phlpp1* differentially regulates *Pth1r* signaling in  
381 bone cells (osteoblasts, osteoclasts, and osteocytes) compared to chondrocytes. Future studies should  
382 probe the relationship between *Phlpp1* and *Pth1r* in individual musculoskeletal types to elucidate this  
383 relationship beyond chondrocytes.

384 In vitro, our results recapitulate the in vivo relationship between *Phlpp1* inhibition and enhanced *Pth1r*  
385 signaling in chondrocytes. While agonism of *Pth1r* with PTH(1-34) enhances *Phlpp1*<sup>-/-</sup> responses,  
386 attenuation of PTH signaling with PTH(7-34) can reverse the effects of *Phlpp1* inhibition. *Phlpp1*-depleted  
387 cells show increased phosphorylation of CREB and treating *Phlpp1*<sup>-/-</sup> cells with PTH(1-34) further  
388 enhanced pCREB, while PTH(7-34) reversed this indicator of *Pth1r* signaling. PTH(1-34) is more  
389 responsive in *Phlpp1*<sup>-/-</sup> cells that have higher concentrations of the *Pth1r* receptor available for PTH(1-34)  
390 binding, as cell metabolic activity and cAMP concentrations were highest in *Phlpp1*<sup>-/-</sup> cells treated with  
391 PTH(1-34). Similarly, cell proliferation, as well as cartilage matrix deposition, were increased in *Phlpp1*<sup>-/-</sup>  
392 cells compared to wild type littermates, with PTH(7-34) attenuating elevated proliferation and



393 chondrogenesis associated with Phlpp1 inhibition. In vivo, BrdU incorporation in the growth plate of P5  
394 mice confirmed the in vitro findings. Further enhancement of cell proliferation as a result of Phlpp1  
395 inhibition has potential implications beyond chondrocytes. Phlpp1 deletion promotes cell proliferation in a  
396 model of intervertebral disc degeneration<sup>(19)</sup> and regulation of cell apoptosis by Phlpp1 is implicated in  
397 ischemic brain and spinal cord injury<sup>(20,22)</sup>, colitis<sup>(21)</sup>, cardiac dysfunction<sup>(66)</sup>, pancreatic beta-cell  
398 survival<sup>(67)</sup>, and tumor activity<sup>(8)</sup>. As such, enhancement of signals associated with Phlpp1 inhibition could  
399 have a profound impact on various physiological and disease processes.

400 Phlpp1 modulates Pth1r signaling through chromatin remodeling of the ubiquitous Pth1r promoter  
401 resulting in increased transcription, as well as greater activation of Pth1r signaling<sup>(68)</sup>. The mechanisms  
402 responsible for increased transcription of Pth1r via Phlpp inhibition remain to be determined, but appear  
403 to involve a modest increase in existing transcriptional events. A variety of transcription factors are known  
404 to bind to the Pth1r promoter and may be active in Phlpp-inhibited chondrocytes<sup>(68-72)</sup>. Numerous potential  
405 transcription factor binding sites within the 2,000 base pair H3K27ac enrichment peak in the Pth1r  
406 promoter were identified and are summarized in **Supplementary Table 1**<sup>(73)</sup>. One promising transcription  
407 factor, YY1, showed increased binding at the Pth1r promoter in response to Phlpp inhibition. Ying Yang 1  
408 (YY1) is a dual function transcription factor that regulates both transcriptional activation and repression  
409 and has been implicated in a host of cellular processes, including differentiation, DNA repair, cell division,  
410 and cell survival<sup>(74)</sup>. Additionally, YY1 facilitates the interaction of active enhancers and promoter-proximal  
411 elements, serving as a general feature of mammalian gene control<sup>(75)</sup>. In chondrocytes, Phlpp inhibitors  
412 increase binding of YY1 to the Pth1r promoter, suggesting that YY1 acts as a transcriptional activator in  
413 Phlpp-inactivated chondrocytes. However, because a large number of factors could associate with this  
414 region of the Pth1r promoter, it is likely that Phlpp1 repression of H3K27ac influences many additional  
415 transcription factors and co-regulators.

416 The relationship between Phlpp1 and Pth1r has applications beyond endochondral ossification during  
417 development. Pth1r<sup>-/-</sup> mice have spontaneous cartilage degeneration and develop more severe post-  
418 traumatic osteoarthritis in the knee than wild type littermates, with greater chondrocyte hypertrophy<sup>(76)</sup>. By  
419 contrast, Phlpp1<sup>-/-</sup> mice and WT mice given an intra-articular injection of NSC117079 into the knee joint



420 are protected from the development of post-traumatic osteoarthritis, with improved allodynia and  
421 functional impairments. As such, Phlpp inhibitors have potential as novel disease modifying osteoarthritis  
422 drugs (DMOADs). Human recombinant PTH(1-34) (teriparatide) is currently in clinical trials as a DMOAD,  
423 following preclinical results of reduced cartilage degeneration and induction of matrix regeneration<sup>(77)</sup>. As  
424 our findings indicate a synergistic relationship between Phlpp1 inhibition and enhanced Pth1r signaling, it  
425 is possible that combinations of Phlpp1 inhibitors and PTH(1-34) could be effective promoters of cartilage  
426 regeneration.

427 In summary, our results demonstrate a novel molecular relationship in which Phlpp1 inhibition enhances  
428 Pth1r expression and signaling in chondrocytes. Repression of Pth1r signaling reversed both the stunted  
429 growth of the appendicular skeleton characteristic of Phlpp1<sup>-/-</sup> mice, and the increased cell proliferation of  
430 Phlpp1<sup>-/-</sup> chondrocytes, both in vitro and in the proliferative zone of the epiphyseal growth plate. Our  
431 findings have implications on multiple processes, including endochondral ossification during development  
432 and musculoskeletal diseases such as osteoarthritis. Phlpp1 and Pth1r signaling is not restricted to the  
433 bone environment, as PTH controls mineral homeostasis<sup>(78)</sup> among other processes, and Phlpp1 is  
434 expressed throughout the mammalian body<sup>(6)</sup>. As such, the Phlpp1-Pth1r relationship could have a  
435 significant impact in the field of musculoskeletal health and beyond.

#### 436 **ACKNOWLEDGEMENTS**

437 The authors thank Xiaodong Li and Carys Turner for technical assistance. The Mayo Clinic X-Ray  
438 Imaging Resources Core Facilities were essential for collection of the microCT data. We are grateful to  
439 the Mayo Clinic Medical Genome Facility Sequencing Core for performing and helping with the analysis of  
440 ChIP-Sequencing. This work was supported by research and training grants from the National Institutes  
441 of Health (AR068103, AR056950, DK07352, AR065397, AR072634).

442 Authors' roles: Study design: EWB, JJW. Study conducted: all authors. Data collection and analysis: all  
443 authors. Data interpretation: SRW, ELT, EWB, JJW. Writing – original draft: SRW. Revising and  
444 approving final version of manuscript: all authors. Supervision: EWB, JJW. Project leadership: SRW, ELT,

445 EWB, JJW. Funding acquisition: EWB, JJW. SRW and JJW take responsibility for the integrity of the data  
446 analysis.

## 447 **FIGURE LEGENDS**

448 **Figure 1.** *Phlpp inhibition increases Pth1r expression in chondrocytes.* (A-D) Pth1r mRNA expression and  
449 protein levels were measured in ATDC5 cells (A,B) and primary chondrocytes (C,D) cultured in the  
450 presence of Phlpp inhibitors for 24 hours. Pth1r (E) mRNA expression and (F) protein levels were  
451 measured in Phlpp1<sup>-/-</sup> primary chondrocytes compared to WT. (G,H) The proximal tibial growth plates of  
452 4-week-old male WT and Phlpp1<sup>-/-</sup> mice are shown. (G) In situ hybridization was performed with a  
453 riboprobe targeted to Pth1r. Scale bar = 50 μm. (H) Immunohistochemistry was performed with an  
454 antibody targeted to Pth1r. Scale bar = 20 μm. Vertical black lines indicate either P = proliferative zone or  
455 H = hypertrophic zone. Statistically significant differences were determined with one-way ANOVA with  
456 Tukey's post-hoc test (A, C) or Student's t test (E).

457 **Figure 2.** *Phlpp1 regulates Pth1r expression through transcription.* (A) Primary WT chondrocytes were  
458 treated with 25 μM Phlpp inhibitors NSC117079 or NSC45586 for 24 hours. These lysates and those from  
459 primary chondrocytes from WT and Phlpp1<sup>-/-</sup> mice were subjected to Western blotting for phosphorylation  
460 of S10 or S28 (pS10 or pS28), as well as K9, K14, and K27 acetylation (ac) of histone 3 (H3). Each blot  
461 was also probed with an antibody that recognizes all (total) H3 to control for loading. (B) H3K27ac ChIP-  
462 sequencing was performed on WT primary chondrocytes treated for 24 hours with vehicle (DMSO) or  
463 25μm NSC117079. Two sites were identified for analysis by ChIP-qPCR, including in the Pth1r promoter  
464 and -1.47kb upstream. (C-D) ChIP-qPCR following pulldown with an H3K27ac antibody was performed  
465 on WT primary chondrocytes treated with vehicle or 25μm NSC117079 and NSC45586 after 24 hours (C)  
466 or on WT or Phlpp1<sup>-/-</sup> primary chondrocytes (D). (E) Pth1r mRNA expression and protein levels were  
467 measured in primary chondrocytes after incubation with 5 μM transcriptional inhibitor actinomycin D for  
468 six hours and subsequent replacement of media containing Phlpp inhibitors for 24 hours. (F) WT primary  
469 chondrocytes were treated with vehicle or 25 μm NSC117079 and NSC45586 for 30 minutes. YY1-Pth1r  
470 promoter complexes were identified by ChIP-qPCR. Statistically significant differences were determined  
471 with two-way ANOVA with Tukey's post-hoc test.

472 **Figure 3.** Daily administration of PTH(7-34) reverses short limb length in *Phlpp1*<sup>-/-</sup> mice. (A,C) Tibia and  
473 (B,D) femur lengths were evaluated in 4-week-old male WT or *Phlpp1*<sup>-/-</sup> mice given daily injections of  
474 PTH(7-34) (100 mg/kg body weight/day) or vehicle (0.1% BSA in PBS). The same treatments were  
475 administered to female WT and *Phlpp1*<sup>-/-</sup> mice and tibia (E,G) and femur (F,H) lengths were evaluated at  
476 4 weeks of age. Scale bar = 5 mm. Statistically significant differences were determined with two-way  
477 ANOVA with Tukey's post-hoc test.

478 **Figure 4.** *Phlpp1* and *Pth1r* coordinate to regulate growth plate development. (A,B) 3D renderings of  
479 proximal tibial growth plates were generated from microCT scans of 4-week-old WT or *Phlpp1*<sup>-/-</sup> male  
480 mice given daily injections of PTH(7-34) (100 mg/kg body weight/day) or vehicle. Scale bar on 2D capture  
481 = 1mm. Color scale bar is in mm. One representative 3D rendering is shown for each group. (C) Areas of  
482 proliferative and hypertrophic zones of the proximal tibia growth plate were quantified. (D) Safranin O /  
483 Fast Green staining was performed on the proximal tibial growth plate. Scale bar = 50  $\mu$ m. Vertical black  
484 lines indicate either P = proliferative zone or H = hypertrophic zone. (E) In situ hybridization was  
485 performed for *Col10a1*. Scale bar = 50  $\mu$ m. (F,G) WT or *Phlpp1*<sup>-/-</sup> mice were injected with either vehicle or  
486 PTH(7-34) daily as described above from postnatal day 1 (P1) through P5. On P5, BrdU was  
487 administered 2 hours prior to euthanasia. (F) Percentage of cells that were BrdU-positive in the proximal  
488 tibial growth plate was quantified, as represented in (G). Scale bar in (G) = 50  $\mu$ m. Statistically significant  
489 differences were determined with two-way ANOVA with Tukey's post-hoc test.

490 **Figure 5.** Daily administration of PTH(7-34) does not affect bone mass. (A) 2D reconstructions from  
491 microCT of the distal femur of 4-week-old WT or *Phlpp1*<sup>-/-</sup> male mice given daily injections of PTH(7-34)  
492 (100 mg/kg body weight/day) or vehicle. Scale bar = 1 mm. Trabecular parameters analyzed via microCT  
493 were (B) bone volume / tissue volume, (C) trabecular number, and (D) bone mineral density. Cortical  
494 parameters included (E) tissue mineral density, (F) cortical thickness, (G) total tissue cross sectional area,  
495 and (H) cortical area fraction. Statistically significant differences were determined with two-way ANOVA  
496 with Tukey's post-hoc test or Student's t test as indicated.

497 **Figure 6.** *Phlpp1* inhibition elevates *Pth1r* signaling cascades. (A) Primary chondrocytes from *Phlpp1*<sup>-/-</sup>  
498 and WT littermates were subjected to Western blotting for *Phlpp1*, *Pth1r*, pCREB (S133), total CREB, and

499 actin following 24 hours in culture, with the last 30 minutes in the presence of vehicle (0.1% BSA in PBS),  
500 PTH(1-34), or PTH(7-34) (100 nM). (B) cAMP levels in primary chondrocytes from Phlpp1<sup>-/-</sup> and WT  
501 littermates were determined by ELISA following addition of PTH(1-34) or PTH(7-34) (100 nM) for 15  
502 minutes. (C) Confluency of WT and Phlpp1<sup>-/-</sup> primary chondrocytes was tracked every hour for 48 hours in  
503 the absence or presence of PTH(1-34) or PTH(7-34) (10 nM). Data in the three graphs are from the same  
504 experiment, but plotted separately for clarity. (D) Primary chondrocytes from Phlpp1<sup>-/-</sup> and WT littermates  
505 were subjected to MTS assay following addition of PTH(1-34) or PTH(7-34) (10 nM) for 24 hours. (E) WT  
506 or Phlpp1<sup>-/-</sup> micromasses were cultured for three days and PTH(1-34) or PTH(7-34) (10 nM) was applied  
507 for the next nine days at which time micromasses were stained with Alcian Blue. Statistically significant  
508 differences were determined with two-way ANOVA with Tukey's post-hoc test.

509 **Supplementary Figure 1. Quantified Western Blots.** (A-C) Pth1r protein levels were measured in (A)  
510 ATDC5s and (B) WT primary chondrocytes after incubation with vehicle or Phlpp inhibitors (25µM  
511 NSC117079 or NSC45586) for 24 hours, as well as in (C) WT or Phlpp1<sup>-/-</sup> primary chondrocytes. Actin  
512 was the loading control. (D-M) (D-H) WT primary chondrocytes were treated with Phlpp inhibitors for 24  
513 hours. (I-M) Primary chondrocytes from WT and Phlpp1<sup>-/-</sup> were grown in culture for 24 hours. The protein  
514 levels measured were (D,I) H3pS10, (E,J) H3pS28, (F,K) H3K27ac, (G,L) H3K9ac, and (H,M)  
515 H3K9K14ac. Total histone 3 (H3) was the loading control. (N) Pth1r protein levels were measured in  
516 primary chondrocytes after incubation with 5 µM actinomycin D for six hours and subsequent replacement  
517 of media containing Phlpp inhibitors for 24 hours. (O-Q) Primary chondrocytes from Phlpp1<sup>-/-</sup> and WT  
518 mice were subjected to Western blotting for Phlpp1, Pth1r, and pCREB (S133) with actin and total CREB  
519 as the loading controls following 24 hours in culture, with the last 30 minutes in the presence of vehicle,  
520 PTH(1-34) (100 mM), or PTH(7-34) (100 nM).

521 **Supplementary Figure 2. Low magnification images of the growth plate.** 5x magnification images of (A)  
522 the growth plates of 4-week-old WT or Phlpp1<sup>-/-</sup> male mice after performing in situ hybridization (ISH) or  
523 immunohistochemistry (IHC) to detect Pth1r. Scale bar = 100 µm. (B,C) Four-week-old WT or Phlpp1<sup>-/-</sup>  
524 mice were given daily injections of PTH(7-34) (100 mg/kg body weight/day) or vehicle. The proximal tibial  
525 growth plate was (B) stained with Safranin O / Fast Green and (C) probed for Col10a1 using ISH. (D) WT

526 or *Phlpp1*<sup>-/-</sup> mice were injected with either vehicle or PTH(7-34) daily as described above from postnatal  
527 day 1 (P1) through P5. On P5, BrdU labeling reagent was administered 2 hours prior to euthanasia and  
528 BrdU-positive cells were identified.

529 **Supplementary Figure 3.** *Small-molecule Phlpp inhibitors increase H3K27ac in Pth1r.* H3K27ac ChIP-  
530 sequencing was performed on WT primary chondrocytes incubated for 24 hours with vehicle (DMSO) or  
531 25µm NSC117079. Data were aligned with publicly available ChIP-Seq datasets from E10.5 and E15.5  
532 limbs for Chr 9: 100,722,085 – 110,747,145. Limb data was retrieved from Ensembl for *Mus musculus*,  
533 version 100.38 (GRCm38.p6).

534 **Supplementary Figure 4.** *Plasma PTH and urine cAMP are the same in WT and Phlpp1*<sup>-/-</sup> *mice.* (A)  
535 Plasma intact PTH(1-84) and (B) urine cAMP corrected for urine creatinine were measured in samples  
536 taken from four-week-old WT and *Phlpp1*<sup>-/-</sup> mice. Statistically significant differences were determined via  
537 one-way ANOVA with Tukey's post-hoc test.

538 **Supplementary Figure 5.** *Daily administration of PTH(7-34) has an intermediate effect on rescuing limb*  
539 *length in Phlpp1 heterozygotes compared to WT or Phlpp1*<sup>-/-</sup> *mice.* (A,E) Femur length, (B,F) tibia length,  
540 (C,G) body length, and (D,H) body weight were evaluated in 4-week-old male and female WT (*Phlpp1*<sup>+/+</sup>),  
541 HET (*Phlpp1*<sup>+/-</sup>), or KO (*Phlpp1*<sup>-/-</sup>) mice given daily injections of PTH(7-34) (100 mg/kg body weight/day)  
542 or vehicle (0.1% BSA in PBS). Statistically significant differences were determined with two-way ANOVA  
543 with Tukey's post-hoc test.

544 **Supplementary Figure 6.** *Daily administration of PTH(7-34) reverses short body length and low body*  
545 *weight in Phlpp1*<sup>-/-</sup> *mice.* (A,C) Tail-to-snout body length and (B,D) body weight were evaluated in 4-week-  
546 old male and female WT or *Phlpp1*<sup>-/-</sup> mice given daily injections of PTH(7-34) (100 mg/kg body  
547 weight/day) or vehicle (0.1% BSA in PBS). Statistically significant differences were determined with two-  
548 way ANOVA with Tukey's post-hoc test.

## 549 REFERENCES

- 550 1. Kronenberg HM. Developmental regulation of the growth plate. *Nature*. May 15  
551 2003;423(6937):332-6. Epub 2003/05/16.

- 552 2. Ono N, Ono W, Nagasawa T, Kronenberg HM. A subset of chondrogenic cells provides early  
553 mesenchymal progenitors in growing bones. *Nat Cell Biol.* Dec 2014;16(12):1157-67. Epub  
554 2014/11/25.
- 555 3. Yang L, Tsang KY, Tang HC, Chan D, Cheah KSE. Hypertrophic chondrocytes can become  
556 osteoblasts and osteocytes in endochondral bone formation. *Proceedings of the National  
557 Academy of Sciences.* 2014;111(33):12097.
- 558 4. Zhou X, von der Mark K, Henry S, Norton W, Adams H, de Crombrugge B. Chondrocytes  
559 transdifferentiate into osteoblasts in endochondral bone during development, postnatal growth  
560 and fracture healing in mice. *PLoS Genet.* Dec 2014;10(12):e1004820. Epub 2014/12/05.
- 561 5. Bradley EW, Carpio LR, Newton AC, Westendorf JJ. Deletion of the PH-domain and Leucine-rich  
562 Repeat Protein Phosphatase 1 (Phlpp1) Increases Fibroblast Growth Factor (Fgf) 18 Expression  
563 and Promotes Chondrocyte Proliferation. *J Biol Chem.* Jun 26 2015;290(26):16272-80. Epub  
564 2015/05/09.
- 565 6. Grzechnik AT, Newton AC. PHLPPing through history: a decade in the life of PHLPP  
566 phosphatases. *Biochem Soc Trans.* Dec 15 2016;44(6):1675-82. Epub 2016/12/04.
- 567 7. Mattson AM, Begun DL, Molstad DHH, Meyer MA, Oursler MJ, Westendorf JJ, et al. Deficiency in  
568 the phosphatase PHLPP1 suppresses osteoclast-mediated bone resorption and enhances bone  
569 formation in mice. *J Biol Chem.* Aug 2 2019;294(31):11772-84. Epub 2019/06/14.
- 570 8. Gao T, Furnari F, Newton AC. PHLPP: a phosphatase that directly dephosphorylates Akt,  
571 promotes apoptosis, and suppresses tumor growth. *Mol Cell.* Apr 1 2005;18(1):13-24. Epub  
572 2005/04/06.
- 573 9. Liu J, Weiss HL, Rychahou P, Jackson LN, Evers BM, Gao T. Loss of PHLPP expression in colon  
574 cancer: role in proliferation and tumorigenesis. *Oncogene.* Feb 19 2009;28(7):994-1004. Epub  
575 2008/12/17.
- 576 10. Gao T, Brognard J, Newton AC. The phosphatase PHLPP controls the cellular levels of protein  
577 kinase C. *J Biol Chem.* Mar 7 2008;283(10):6300-11. Epub 2007/12/29.
- 578 11. Liu J, Stevens PD, Li X, Schmidt MD, Gao T. PHLPP-mediated dephosphorylation of S6K1  
579 inhibits protein translation and cell growth. *Mol Cell Biol.* Dec 2011;31(24):4917-27. Epub  
580 2011/10/12.
- 581 12. Reyes G, Niederst M, Cohen-Katsenelson K, Stender JD, Kunkel MT, Chen M, et al. Pleckstrin  
582 homology domain leucine-rich repeat protein phosphatases set the amplitude of receptor tyrosine  
583 kinase output. *Proc Natl Acad Sci U S A.* Sep 23 2014;111(38):E3957-65. Epub 2014/09/10.
- 584 13. Nowak DG, Katsenelson KC, Watrud KE, Chen M, Mathew G, D'Andrea VD, et al. The PHLPP2  
585 phosphatase is a druggable driver of prostate cancer progression. *J Cell Biol.* Jun 3  
586 2019;218(6):1943-57. Epub 2019/05/17.
- 587 14. Xiong X, Wen YA, Mitov MI, M CO, Miyamoto S, Gao T. PHLPP regulates hexokinase 2-  
588 dependent glucose metabolism in colon cancer cells. *Cell Death Discov.* 2017;3:16103. Epub  
589 2017/02/10.
- 590 15. Hribal ML, Mancuso E, Spiga R, Mannino GC, Fiorentino TV, Andreozzi F, et al. PHLPP  
591 phosphatases as a therapeutic target in insulin resistance-related diseases. *Expert Opin Ther  
592 Targets.* Jun 2016;20(6):663-75. Epub 2015/12/15.
- 593 16. Patterson SJ, Han JM, Garcia R, Assi K, Gao T, O'Neill A, et al. Cutting edge: PHLPP regulates  
594 the development, function, and molecular signaling pathways of regulatory T cells. *J Immunol.*  
595 May 15 2011;186(10):5533-7. Epub 2011/04/19.
- 596 17. Bradley EW, Carpio LR, McGee-Lawrence ME, Castillejo Becerra C, Amanatullah DF, Ta LE, et  
597 al. Phlpp1 facilitates post-traumatic osteoarthritis and is induced by inflammation and promoter  
598 demethylation in human osteoarthritis. *Osteoarthritis Cartilage.* 2016;24(6):1021-8. Epub  
599 2015/12/31.
- 600 18. Hwang SM, Feigenson M, Begun DL, Shull LC, Culley KL, Otero M, et al. Phlpp inhibitors block  
601 pain and cartilage degradation associated with osteoarthritis. *J Orthop Res.* May  
602 2018;36(5):1487-97. Epub 2017/10/27.
- 603 19. Zhang C, Smith MP, Zhou GK, Lai A, Hoy RC, Mroz V, et al. Phlpp1 is associated with human  
604 intervertebral disc degeneration and its deficiency promotes healing after needle puncture injury  
605 in mice. *Cell Death Dis.* Oct 3 2019;10(10):754. Epub 2019/10/05.



- 606 20. Shao Z, Lv G, Wen P, Cao Y, Yu D, Lu Y, et al. Silencing of PHLPP1 promotes neuronal  
607 apoptosis and inhibits functional recovery after spinal cord injury in mice. *Life Sci.* Sep 15  
608 2018;209:291-9. Epub 2018/08/17.
- 609 21. Wen YA, Li X, Goretsky T, Weiss HL, Barrett TA, Gao T. Loss of PHLPP protects against colitis  
610 by inhibiting intestinal epithelial cell apoptosis. *Biochim Biophys Acta.* Oct 2015;1852(10 Pt  
611 A):2013-23. Epub 2015/07/19.
- 612 22. Chen B, Van Winkle JA, Lyden PD, Brown JH, Purcell NH. PHLPP1 gene deletion protects the  
613 brain from ischemic injury. *J Cereb Blood Flow Metab.* Feb 2013;33(2):196-204. Epub  
614 2012/10/18.
- 615 23. Jackson TC, Verrier JD, Drabek T, Janesko-Feldman K, Gillespie DG, Uray T, et al.  
616 Pharmacological inhibition of pleckstrin homology domain leucine-rich repeat protein  
617 phosphatase is neuroprotective: differential effects on astrocytes. *J Pharmacol Exp Ther.* Nov  
618 2013;347(2):516-28. Epub 2013/09/12.
- 619 24. Jackson TC, Dixon CE, Janesko-Feldman K, Vagni V, Kotermanski SE, Jackson EK, et al. Acute  
620 Physiology and Neurologic Outcomes after Brain Injury in SCOP/PHLPP1 KO Mice. *Sci Rep.* May  
621 8 2018;8(1):7158. Epub 2018/05/10.
- 622 25. Cheloha RW, Gellman SH, Vilardaga JP, Gardella TJ. PTH receptor-1 signalling-mechanistic  
623 insights and therapeutic prospects. *Nat Rev Endocrinol.* Dec 2015;11(12):712-24. Epub  
624 2015/08/26.
- 625 26. Yamamoto T, Kambe F, Cao X, Lu X, Ishiguro N, Seo H. Parathyroid hormone activates  
626 phosphoinositide 3-kinase-Akt-Bad cascade in osteoblast-like cells. *Bone.* Feb 2007;40(2):354-9.  
627 Epub 2006/10/19.
- 628 27. Miao D, Tong XK, Chan GK, Panda D, McPherson PS, Goltzman D. Parathyroid hormone-related  
629 peptide stimulates osteogenic cell proliferation through protein kinase C activation of the  
630 Ras/mitogen-activated protein kinase signaling pathway. *J Biol Chem.* Aug 24  
631 2001;276(34):32204-13. Epub 2001/06/13.
- 632 28. Gesty-Palmer D, Chen M, Reiter E, Ahn S, Nelson CD, Wang S, et al. Distinct beta-arrestin- and  
633 G protein-dependent pathways for parathyroid hormone receptor-stimulated ERK1/2 activation. *J  
634 Biol Chem.* Apr 21 2006;281(16):10856-64. Epub 2006/02/24.
- 635 29. Fan Y, Hanai JI, Le PT, Bi R, Maridas D, DeMambro V, et al. Parathyroid Hormone Directs Bone  
636 Marrow Mesenchymal Cell Fate. *Cell Metab.* Mar 7 2017;25(3):661-72. Epub 2017/02/07.
- 637 30. Rhee Y, Allen MR, Condon K, Lezcano V, Ronda AC, Galli C, et al. PTH receptor signaling in  
638 osteocytes governs periosteal bone formation and intracortical remodeling. *J Bone Miner Res.*  
639 May 2011;26(5):1035-46. Epub 2010/12/09.
- 640 31. Qiu T, Xian L, Crane J, Wen C, Hilton M, Lu W, et al. PTH receptor signaling in osteoblasts  
641 regulates endochondral vascularization in maintenance of postnatal growth plate. *Journal of bone  
642 and mineral research : the official journal of the American Society for Bone and Mineral  
643 Research.* 2015;30(2):309-17.
- 644 32. Calvi LM, Sims NA, Hunzelman JL, Knight MC, Giovannetti A, Saxton JM, et al. Activated  
645 parathyroid hormone/parathyroid hormone-related protein receptor in osteoblastic cells  
646 differentially affects cortical and trabecular bone. *J Clin Invest.* Feb 2001;107(3):277-86. Epub  
647 2001/02/13.
- 648 33. Becher C, Szuwart T, Ronstedt P, Ostermeier S, Skwara A, Fuchs-Winkelmann S, et al.  
649 Decrease in the expression of the type 1 PTH/PTHrP receptor (PTH1R) on chondrocytes in  
650 animals with osteoarthritis. *J Orthop Surg Res.* 2010;5:28-.
- 651 34. Vortkamp A, Lee K, Lanske B, Segre GV, Kronenberg HM, Tabin CJ. Regulation of rate of  
652 cartilage differentiation by Indian hedgehog and PTH-related protein. *Science.* Aug 2  
653 1996;273(5275):613-22. Epub 1996/08/02.
- 654 35. Hirai T, Chagin AS, Kobayashi T, Mackem S, Kronenberg HM. Parathyroid hormone/parathyroid  
655 hormone-related protein receptor signaling is required for maintenance of the growth plate in  
656 postnatal life. *Proc Natl Acad Sci U S A.* Jan 4 2011;108(1):191-6. Epub 2010/12/22.
- 657 36. Sneddon WB, Magyar CE, Willick GE, Syme CA, Galbiati F, Bisello A, et al. Ligand-selective  
658 dissociation of activation and internalization of the parathyroid hormone (PTH) receptor:  
659 conditional efficacy of PTH peptide fragments. *Endocrinology.* Jun 2004;145(6):2815-23. Epub  
660 2004/03/16.

- 661 37. Silva BC, Costa AG, Cusano NE, Kousteni S, Bilezikian JP. Catabolic and anabolic actions of  
662 parathyroid hormone on the skeleton. *J Endocrinol Invest*. Nov 2011;34(10):801-10. Epub  
663 2011/09/29.
- 664 38. Wein MN, Kronenberg HM. Regulation of Bone Remodeling by Parathyroid Hormone. *Cold  
665 Spring Harb Perspect Med*. Aug 1 2018;8(8). Epub 2018/01/24.
- 666 39. Gardinier JD, Mohamed F, Kohn DH. PTH Signaling During Exercise Contributes to Bone  
667 Adaptation. *J Bone Miner Res*. Jun 2015;30(6):1053-63. Epub 2014/12/23.
- 668 40. Gosset M, Berenbaum F, Thirion S, Jacques C. Primary culture and phenotyping of murine  
669 chondrocytes. *Nat Protoc*. 2008;3(8):1253-60. Epub 2008/08/21.
- 670 41. Carpio LR, Bradley EW, McGee-Lawrence ME, Weivoda MM, Poston DD, Dudakovic A, et al.  
671 Histone deacetylase 3 supports endochondral bone formation by controlling cytokine signaling  
672 and matrix remodeling. *Sci Signal*. Aug 9 2016;9(440):ra79. Epub 2016/08/11.
- 673 42. Livak KJ, Schmittgen TD. Analysis of relative gene expression data using real-time quantitative  
674 PCR and the 2(-Delta Delta C(T)) Method. *Methods*. Dec 2001;25(4):402-8. Epub 2002/02/16.
- 675 43. MatLab. 2019b ed. Natick, MA: Mathworks; 2019.
- 676 44. Masubuchi S, Gao T, Neill A, Eckel-Mahan K, Newton AC, Sassone-Corsi P. Protein  
677 phosphatase PHLPP1 controls the light-induced resetting of the circadian clock. *Proceedings of  
678 the National Academy of Sciences*. 2010;107(4):1642.
- 679 45. Xie Y, Su N, Jin M, Qi H, Yang J, Li C, et al. Intermittent PTH (1-34) injection rescues the  
680 retarded skeletal development and postnatal lethality of mice mimicking human achondroplasia  
681 and thanatophoric dysplasia. *Hum Mol Genet*. Sep 15 2012;21(18):3941-55. Epub 2012/05/29.
- 682 46. Bouxsein ML, Boyd SK, Christiansen BA, Guldberg RE, Jepsen KJ, Muller R. Guidelines for  
683 assessment of bone microstructure in rodents using micro-computed tomography. *J Bone Miner  
684 Res*. Jul 2010;25(7):1468-86. Epub 2010/06/10.
- 685 47. Fedorov A, Beichel R, Kalpathy-Cramer J, Finet J, Fillion-Robin JC, Pujol S, et al. 3D Slicer as an  
686 image computing platform for the Quantitative Imaging Network. *Magn Reson Imaging*. Nov  
687 2012;30(9):1323-41. Epub 2012/07/10.
- 688 48. Shazeeb MS, Cox MK, Gupta A, Tang W, Singh K, Pryce CT, et al. Skeletal Characterization of  
689 the Fgfr3 Mouse Model of Achondroplasia Using Micro-CT and MRI Volumetric Imaging.  
690 *Scientific Reports*. 2018/01/11 2018;8(1):469.
- 691 49. Mead TJ, Lefebvre V. Proliferation assays (BrdU and EdU) on skeletal tissue sections. *Methods  
692 Mol Biol*. 2014;1130:233-43. Epub 2014/02/01.
- 693 50. Bradley EW, Carpio LR, Westendorf JJ. Histone deacetylase 3 suppression increases PH domain  
694 and leucine-rich repeat phosphatase (Phlp1) expression in chondrocytes to suppress Akt  
695 signaling and matrix secretion. *J Biol Chem*. Apr 5 2013;288(14):9572-82. Epub 2013/02/15.
- 696 51. Yates AD, Achuthan P, Akanni W, Allen J, Allen J, Alvarez-Jarreta J, et al. Ensembl 2020.  
697 *Nucleic Acids Research*. 2019;48(D1):D682-D8.
- 698 52. Tyson DR, Swarthout JT, Partridge NC. Increased osteoblastic c-fos expression by parathyroid  
699 hormone requires protein kinase A phosphorylation of the cyclic adenosine 3',5'-monophosphate  
700 response element-binding protein at serine 133. *Endocrinology*. Mar 1999;140(3):1255-61. Epub  
701 1999/03/06.
- 702 53. Qin L, Partridge NC. Stimulation of amphiregulin expression in osteoblastic cells by parathyroid  
703 hormone requires the protein kinase A and cAMP response element-binding protein signaling  
704 pathway. *J Cell Biochem*. Oct 15 2005;96(3):632-40. Epub 2005/08/10.
- 705 54. Jobert AS, Zhang P, Couvineau A, Bonaventure J, Roume J, Le Merrer M, et al. Absence of  
706 functional receptors for parathyroid hormone and parathyroid hormone-related peptide in  
707 Blomstrand chondrodysplasia. *J Clin Invest*. Jul 1 1998;102(1):34-40. Epub 1998/07/03.
- 708 55. Schipani E, Langman CB, Parfitt AM, Jensen GS, Kikuchi S, Kooh SW, et al. Constitutively  
709 activated receptors for parathyroid hormone and parathyroid hormone-related peptide in Jansen's  
710 metaphyseal chondrodysplasia. *N Engl J Med*. Sep 5 1996;335(10):708-14. Epub 1996/09/05.
- 711 56. Schipani E, Kruse K, Jüppner H. A constitutively active mutant PTH-PTHrP receptor in Jansen-  
712 type metaphyseal chondrodysplasia. *Science*. Apr 7 1995;268(5207):98-100. Epub 1995/04/07.
- 713 57. Chung UI, Lanske B, Lee K, Li E, Kronenberg H. The parathyroid hormone/parathyroid hormone-  
714 related peptide receptor coordinates endochondral bone development by directly controlling  
715 chondrocyte differentiation. *Proc Natl Acad Sci U S A*. Oct 27 1998;95(22):13030-5. Epub  
716 1998/10/28.



- 717 58. Schipani E, Lanske B, Hunzelman J, Luz A, Kovacs CS, Lee K, et al. Targeted expression of  
718 constitutively active receptors for parathyroid hormone and parathyroid hormone-related peptide  
719 delays endochondral bone formation and rescues mice that lack parathyroid hormone-related  
720 peptide. *Proc Natl Acad Sci U S A*. Dec 9 1997;94(25):13689-94. Epub 1998/02/12.
- 721 59. Tobias JH, Cooper C. Perspective: PTH/PTHrP Activity and the Programming of Skeletal  
722 Development In Utero. *Journal of Bone and Mineral Research*. 2004;19(2):177-82.
- 723 60. Jee YH, Baron J. The Biology of Stature. *J Pediatr*. Jun 2016;173:32-8. Epub 2016/03/31.
- 724 61. Ryan BA, Kovacs CS. Calcitropic and phosphotropic hormones in fetal and neonatal bone  
725 development. *Semin Fetal Neonatal Med*. Feb 2020;25(1):101062. Epub 2019/12/02.
- 726 62. Qin L, Raggatt LJ, Partridge NC. Parathyroid hormone: a double-edged sword for bone  
727 metabolism. *Trends Endocrinol Metab*. Mar 2004;15(2):60-5. Epub 2004/03/24.
- 728 63. Alexander JM, Bab I, Fish S, Müller R, Uchiyama T, Gronowicz G, et al. Human parathyroid  
729 hormone 1-34 reverses bone loss in ovariectomized mice. *J Bone Miner Res*. Sep  
730 2001;16(9):1665-73. Epub 2001/09/08.
- 731 64. Sheehan S, Muthusamy A, Paul E, Sikes RA, Gomes RR, Jr. Short-term intermittent PTH 1-34  
732 administration enhances bone formation in SCID/Beige mice. *Endocr J*. 2010;57(5):373-82. Epub  
733 2010/02/09.
- 734 65. Le Henaff C, Ricarte F, Finnie B, He Z, Johnson J, Warshaw J, et al. Abaloparatide at the Same  
735 Dose Has the Same Effects on Bone as PTH (1-34) in Mice. *Journal of Bone and Mineral  
736 Research*. 2020;35(4):714-24.
- 737 66. Zhang M, Wang X, Liu M, Liu D, Pan J, Tian J, et al. Inhibition of PHLPP1 ameliorates cardiac  
738 dysfunction via activation of the PI3K/Akt/mTOR signalling pathway in diabetic cardiomyopathy. *J  
739 Cell Mol Med*. Apr 2020;24(8):4612-23. Epub 2020/03/10.
- 740 67. Hribal ML, Mancuso E, Arcidiacono GP, Greco A, Musca D, Procopio T, et al. The Phosphatase  
741 PHLPP2 Plays a Key Role in the Regulation of Pancreatic Beta-Cell Survival. *Int J Endocrinol*.  
742 2020;2020:1027386. Epub 2020/05/16.
- 743 68. Kawane T, Mimura J, Fujii-Kuriyama Y, Horiuchi N. Identification of the promoter region of the  
744 parathyroid hormone receptor gene responsible for transcriptional suppression by insulin-like  
745 growth factor-I. *Arch Biochem Biophys*. Jul 1 2005;439(1):61-9. Epub 2005/06/14.
- 746 69. Kawane T, Mimura J, Yanagawa T, Fujii-Kuriyama Y, Horiuchi N. Parathyroid hormone (PTH)  
747 down-regulates PTH/PTH-related protein receptor gene expression in UMR-106 osteoblast-like  
748 cells via a 3',5'-cyclic adenosine monophosphate-dependent, protein kinase A-independent  
749 pathway. *J Endocrinol*. Aug 2003;178(2):247-56. Epub 2003/08/09.
- 750 70. Minagawa M, Kwan MY, Bettoun JD, Mansour FW, Dassa J, Hendy GN, et al. Dissection of  
751 differentially regulated (G+C)-rich promoters of the human parathyroid hormone (PTH)/PTH-  
752 related peptide receptor gene. *Endocrinology*. Jul 2000;141(7):2410-21. Epub 2000/06/30.
- 753 71. Tohmonda T, Yoda M, Mizuochi H, Morioka H, Matsumoto M, Urano F, et al. The IRE1 $\alpha$ -XBP1  
754 pathway positively regulates parathyroid hormone (PTH)/PTH-related peptide receptor  
755 expression and is involved in pth-induced osteoclastogenesis. *J Biol Chem*. Jan 18  
756 2013;288(3):1691-5. Epub 2012/12/14.
- 757 72. Su S, Cao J, Meng X, Liu R, Ark AV, Woodford E, et al. Enzalutamide-induced PTH1R-mediated  
758 TGFBR2 decrease in osteoblasts contributes to resistance in prostate cancer bone metastases.  
759 *bioRxiv*. 2019:829044.
- 760 73. Kang R, Zhang Y, Huang Q, Meng J, Ding R, Chang Y, et al. EnhancerDB: a resource of  
761 transcriptional regulation in the context of enhancers. *Database*. 2019;2019.
- 762 74. Sarvagalla S, Kolapalli SP, Vallabhapurapu S. The Two Sides of YY1 in Cancer: A Friend and a  
763 Foe. *Front Oncol*. 2019;9:1230. Epub 2019/12/12.
- 764 75. Weintraub AS, Li CH, Zamudio AV, Sigova AA, Hannett NM, Day DS, et al. YY1 Is a Structural  
765 Regulator of Enhancer-Promoter Loops. *Cell*. Dec 14 2017;171(7):1573-88.e28. Epub  
766 2017/12/12.
- 767 76. Kamal F, Schott EM, Carlson EL, El-Quadi M, Le Bleu HK, Hilton MJ, et al. Chondrocyte PTH1R  
768 anti-hypertrophic signaling is essential for articular cartilage maintenance and protection post  
769 trauma. *Osteoarthritis Cartilage*. 2017;25:S13-S4.
- 770 77. Sampson ER, Hilton MJ, Tian Y, Chen D, Schwarz EM, Mooney RA, et al. Teriparatide as a  
771 chondroregenerative therapy for injury-induced osteoarthritis. *Sci Transl Med*. Sep 21  
772 2011;3(101):101ra93. Epub 2011/09/23.

773 78. Khundmiri SJ, Murray RD, Lederer E. PTH and Vitamin D. *Compr Physiol*. Mar 15 2016;6(2):561-  
774 601. Epub 2016/04/12.

775

776 **TABLES**

777 **Supplementary Table 1.** *Candidate transcription factor binding sites within the Pth1r promoter.* Primary  
778 chondrocytes were treated with NSC117079 for 24 hours and analyzed by ChIP-Seq. The DNA sequence  
779 under the H3K27Ac peak in the Pth1r promoter (chromosome 9: 110742000-110744000) was used to  
780 search EnhancerDB (<http://lccb.swjtu.edu.cn/EnhancerDB/>) and identify candidate transcription factors  
781 binding to this region.

| TF Name               | Start     | End       | Source   | TF Name        | Start                                                         | End       | Source    |        |
|-----------------------|-----------|-----------|----------|----------------|---------------------------------------------------------------|-----------|-----------|--------|
| <b>ETS2</b>           | 110743298 | 110743303 | TRANSFAC | <b>BHLHE40</b> | 110743562                                                     | 110743572 | JASPAR    |        |
|                       | 110743956 | 110743961 | TRANSFAC | <b>CEBPB</b>   | 110743347                                                     | 110743358 | JASPAR    |        |
| <b>H1TF2</b>          | 110743420 | 110743424 | TRANSFAC | <b>CLOCK</b>   | 110743562                                                     | 110743572 | JASPAR    |        |
|                       | 110743687 | 110743691 | TRANSFAC | <b>DMRT3</b>   | 110743247                                                     | 110743258 | JASPAR    |        |
| <b>MYB</b>            | 110743245 | 110743248 | TRANSFAC | <b>EBF1</b>    | 110743834                                                     | 110743845 | JASPAR    |        |
|                       | 110743255 | 110743260 | TRANSFAC | <b>EOMES</b>   | 110743582                                                     | 110743595 | JASPAR    |        |
|                       | 110743373 | 110743378 | TRANSFAC | <b>FOXF2</b>   | 110743351                                                     | 110743365 | JASPAR    |        |
|                       | 110743726 | 110743729 | TRANSFAC | <b>FOXG1</b>   | 110743356                                                     | 110743364 | JASPAR    |        |
| <b>MYC</b>            | 110743564 | 110743569 | TRANSFAC | <b>FOXP1</b>   | 110743934                                                     | 110743949 | JASPAR    |        |
| <b>NFE</b>            | 110743420 | 110743424 | TRANSFAC |                | 110743939                                                     | 110743954 | JASPAR    |        |
|                       | 110743620 | 110743624 | TRANSFAC |                | 110743944                                                     | 110743959 | JASPAR    |        |
|                       | 110743687 | 110743691 | TRANSFAC |                | 110743959                                                     | 110743974 | JASPAR    |        |
| <b>SRF</b>            | 110743420 | 110743424 | TRANSFAC |                | 110743968                                                     | 110743983 | JASPAR    |        |
|                       | 110743687 | 110743691 | TRANSFAC |                | 110743974                                                     | 110743989 | JASPAR    |        |
| <b>TEAD2</b>          | 110743724 | 110743728 | TRANSFAC |                | 110743976                                                     | 110743991 | JASPAR    |        |
| <b>USF1,<br/>USF2</b> | 110743564 | 110743569 | TRANSFAC |                | 110743977                                                     | 110743992 | JASPAR    |        |
| <b>YY1</b>            | 110743204 | 110743208 | TRANSFAC |                | 110743982                                                     | 110743997 | JASPAR    |        |
|                       | 110743469 | 110743473 | TRANSFAC |                | 110743984                                                     | 110744006 | JASPAR    |        |
|                       | 110743485 | 110743489 | TRANSFAC |                | <b>HEY1</b>                                                   | 110743562 | 110743572 | JASPAR |
|                       | 110743558 | 110743562 | TRANSFAC |                | <b>HOXC10,<br/>HOXC11,<br/>HOXC12,<br/>HOXC13,<br/>HOXD11</b> | 110743440 | 110743451 | JASPAR |
|                       | 110743652 | 110743656 | TRANSFAC |                | <b>IRF1, IRF7,</b>                                            | 110743382 | 110743394 | JASPAR |

|  |           |           |           |                                               |           |           |        |
|--|-----------|-----------|-----------|-----------------------------------------------|-----------|-----------|--------|
|  | 110743932 | 110743936 | TRANSFAC  | <b>IRF8, IRF9</b>                             | 110743927 | 110743948 | JASPAR |
|  |           |           |           |                                               | 110743933 | 110743954 | JASPAR |
|  |           |           |           |                                               | 110743934 | 110743955 | JASPAR |
|  |           |           |           |                                               | 110743938 | 110743959 | JASPAR |
|  |           |           |           |                                               | 110743939 | 110743960 | JASPAR |
|  |           |           |           |                                               | 110743943 | 110743964 | JASPAR |
|  |           |           |           |                                               | 110743949 | 110743970 | JASPAR |
|  |           |           |           |                                               | 110743954 | 110743975 | JASPAR |
|  |           |           |           |                                               | 110743963 | 110743984 | JASPAR |
|  |           |           |           |                                               | 110743967 | 110743988 | JASPAR |
|  |           |           |           |                                               | 110743969 | 110743990 | JASPAR |
|  |           |           |           |                                               | 110743973 | 110743994 | JASPAR |
|  |           |           |           |                                               | 110743975 | 110743996 | JASPAR |
|  |           |           |           |                                               | 110743976 | 110743997 | JASPAR |
|  |           |           |           |                                               | 110743977 | 110743998 | JASPAR |
|  |           |           |           |                                               | 110743981 | 11074402  | JASPAR |
|  |           |           |           |                                               | 110743982 | 11074403  | JASPAR |
|  |           |           |           |                                               | 110743983 | 110744004 | JASPAR |
|  |           |           |           | <b>JUN</b>                                    | 110743236 | 110743249 | JASPAR |
|  |           |           |           | <b>MAFF,<br/>MAFK,<br/>MAFG</b>               | 110743448 | 110743471 | JASPAR |
|  |           |           | 110743623 |                                               | 110743638 | JASPAR    |        |
|  |           |           | 110743767 |                                               | 110743785 | JASPAR    |        |
|  |           |           |           | <b>MAX</b>                                    | 110743562 | 110743572 | JASPAR |
|  |           |           |           | <b>MEF2A,<br/>MEF2B,<br/>MEF2C,<br/>MEF2D</b> | 110743465 | 110743481 | JASPAR |
|  |           |           |           |                                               | 110743728 | 110743740 | JASPAR |
|  |           |           |           | <b>MFZ1</b>                                   | 110743786 | 110743792 | JASPAR |
|  |           |           |           | <b>MNT</b>                                    | 110743562 | 110743572 | JASPAR |
|  |           |           |           | <b>NFATC2,<br/>NFATC3</b>                     | 110743390 | 110743400 | JASPAR |
|  |           |           |           | <b>NFE2L2</b>                                 | 110743456 | 110743467 | JASPAR |
|  |           |           |           |                                               | 110743902 | 110743913 | JASPAR |
|  |           |           |           | <b>NRL</b>                                    | 110743627 | 110743638 | JASPAR |
|  |           |           |           |                                               | 110743769 | 110743780 | JASPAR |
|  |           |           |           | <b>ONECUT3</b>                                | 110743509 | 110743523 | JASPAR |
|  |           |           |           | <b>PAX5</b>                                   | 110743338 | 110743357 | JASPAR |
|  |           |           |           | <b>PHOX2A</b>                                 | 110743397 | 110743408 | JASPAR |
|  |           |           |           | <b>POU4F1,<br/>POU4F2,<br/>POU4F3</b>         | 110743445 | 110743461 | JASPAR |

|           |                                                                |           |           |        |
|-----------|----------------------------------------------------------------|-----------|-----------|--------|
|           | <b>POU2F1,<br/>POU3F1,<br/>POU3F2,<br/>POU3F4,<br/>POU5F1B</b> | 110743600 | 110743613 | JASPAR |
|           | <b>PRDM1</b>                                                   | 110743945 | 110743960 | JASPAR |
|           |                                                                | 110743956 | 110743971 | JASPAR |
|           |                                                                | 110743965 | 110743980 | JASPAR |
|           |                                                                | 110743969 | 110743984 | JASPAR |
|           | <b>PROP1</b>                                                   | 110743397 | 110743408 | JASPAR |
|           | <b>RELA</b>                                                    | 110743605 | 110743615 | JASPAR |
|           | <b>RREB1</b>                                                   | 110743563 | 110743583 | JASPAR |
|           | <b>SPIC</b>                                                    | 110743966 | 110743980 | JASPAR |
|           | <b>STAT1</b>                                                   | 110743952 | 110743966 | JASPAR |
|           |                                                                | 110743966 | 110743980 | JASPAR |
|           | <b>STAT2</b>                                                   | 110743880 | 110743895 | JASPAR |
|           |                                                                | 110743935 | 110743950 | JASPAR |
|           |                                                                | 110743940 | 110743955 | JASPAR |
|           |                                                                | 110743945 | 110743960 | JASPAR |
|           |                                                                | 110743951 | 110743966 | JASPAR |
|           |                                                                | 110743956 | 110743971 | JASPAR |
|           | <b>STAT3</b>                                                   | 110743965 | 110743980 | JASPAR |
|           |                                                                | 110743216 | 110743227 | JASPAR |
|           | <b>TFAP2A,<br/>TFAP2B,<br/>TFAP2C</b>                          | 110743269 | 110743281 | JASPAR |
|           |                                                                | 110743711 | 110743726 | JASPAR |
|           |                                                                | 110743833 | 110743846 | JASPAR |
|           |                                                                | 110743845 | 110743860 | JASPAR |
|           | <b>TBR1</b>                                                    | 110743583 | 110743593 | JASPAR |
|           | <b>TBX20,<br/>TBX21</b>                                        | 110743582 | 110743593 | JASPAR |
|           | <b>YY1</b>                                                     | 110743436 | 110743442 | JASPAR |
|           | <b>ZBTB7B,<br/>ZBTB7C</b>                                      | 110743272 | 110743284 | JASPAR |
|           | <b>ZNF263</b>                                                  | 110743938 | 110743959 | JASPAR |
|           |                                                                | 110743942 | 110743963 | JASPAR |
|           |                                                                | 110743946 | 110743967 | JASPAR |
| 110743955 |                                                                | 110743976 | JASPAR    |        |
| 110743958 |                                                                | 110743979 | JASPAR    |        |

782

783 **Supplementary Table 2. Antibodies.**

| <b>Product Name</b> | <b>Source and Catalog #</b> | <b>Host Species</b> | <b>Application</b> | <b>Dilution</b> | <b>Application specific details</b> |
|---------------------|-----------------------------|---------------------|--------------------|-----------------|-------------------------------------|
| Mouse Phlpp1 (PH)   | Sigma 07-1341               | Rabbit              | WB                 | 1:1000          | 5% BSA, overnight,                  |

|                                                                                      |                                  |        |                 |          |                                                                          |
|--------------------------------------------------------------------------------------|----------------------------------|--------|-----------------|----------|--------------------------------------------------------------------------|
| domain and Leucine rich repeat Protein Phosphatase 1)                                |                                  |        |                 |          | 4°C                                                                      |
| Mouse Pth1r (Parathyroid hormone receptor)                                           | Sigma SAB4502493                 | Rabbit | WB              | 1:1000   | 5% BSA, overnight, 4°C                                                   |
|                                                                                      |                                  |        | IHC             | 1:50     | Abcam ab93697 Mouse and Rabbit Specific HRP Plus (ABC) Detection IHC Kit |
| Mouse H3PS10 (histone 3, serine 10 phosphorylation)                                  | Abcam ab5176                     | Rabbit | WB              | 1:1000   | 5% BSA, overnight, 4°C                                                   |
| Mouse H3K9ac (histone 3, lysine 9 acetylation)                                       | Abcam ab10812                    | Rabbit | WB              | 1:1000   | 5% BSA, overnight, 4°C                                                   |
| Mouse H3K27ac (histone 3, lysine 27 acetylation)                                     | Abcam ab4729                     | Rabbit | WB              | 1:1000   | 5% BSA, overnight, 4°C                                                   |
|                                                                                      |                                  |        | ChIP            | 2 µg     | Overnight, 4°C                                                           |
| Mouse H3K27ac (histone 3, lysine 27 acetylation)                                     | Cell Signaling Technology 8173BC | Rabbit | ChIP-Sequencing | 2 µg     | Overnight, 4°C                                                           |
| Mouse H3PS28 (histone 3, serine 28 phosphorylation)                                  | Cell Signaling Technology 9713S  | Rabbit | WB              | 1:1000   | 5% BSA, overnight, 4°C                                                   |
| Mouse H3K8K14ac (histone 3, lysine 8, lysine 14 acetylation)                         | Cell Signaling Technology 9677S  | Rabbit | WB              | 1:1000   | 5% BSA, overnight, 4°C                                                   |
| Mouse Total H3 (histone 3)                                                           | Abcam ab1791                     | Rabbit | WB              | 1:1000   | 5% BSA, overnight, 4°C                                                   |
| Mouse YY1 (Ying Yang 1)                                                              | Active Motif 61780               | Rabbit | WB              | 1:1000   | 5% BSA, overnight, 4°C                                                   |
| Mouse pCREB-S133 (cAMP response element-binding protein, serine 133 phosphorylation) | Cell Signaling Technology 9198S  | Rabbit | WB              | 1:1000   | 5% BSA, overnight, 4°C                                                   |
| Mouse Total CREB (cAMP response element-binding protein)                             | Cell Signaling Technology 4820   | Rabbit | WB              | 1:1000   | 5% BSA, overnight, 4°C                                                   |
| Mouse Actin                                                                          | Sigma A4700                      | Mouse  | WB              | 1:1000   | 5% BSA, overnight, 4°C                                                   |
| Anti-Rabbit IgG, HRP-linked                                                          | Cell Signaling Technology 7074S  | Goat   | WB              | 1:10,000 | TBSTw, 1h, RT                                                            |
| Normal Rabbit IgG                                                                    | Cell Signaling Technology 2729   | Rabbit | IHC             | 1:50     | Abcam ab93697 Mouse and Rabbit Specific HRP Plus (ABC) Detection IHC Kit |

784

785 **Supplementary Table 3. Biological Modulators.**

| Modulator | Source and Catalog # | Solvent / Vehicle | Concentration |
|-----------|----------------------|-------------------|---------------|
| NSC117079 | Glix Laboratories    | DMSO              | 25µM          |

|           |                                  |                 |                                                                   |
|-----------|----------------------------------|-----------------|-------------------------------------------------------------------|
|           | GLXC-03994                       |                 |                                                                   |
| NSC45586  | Glxxx Laboratories<br>GLXC-03991 | DMSO            | 25µM                                                              |
| PTH(1-34) | Bachem 4011474                   | 0.1% BSA in PBS | 10nM or 100nM                                                     |
| PTH(7-34) | Bachem 4016931                   | 0.1% BSA in PBS | In vivo: 100 µg/kg body<br>weight/day<br>In vitro: 10 nM or 100nM |

786



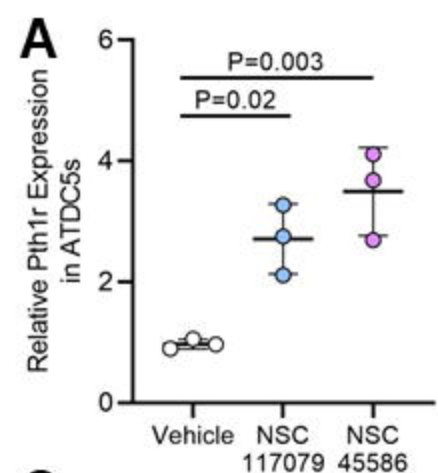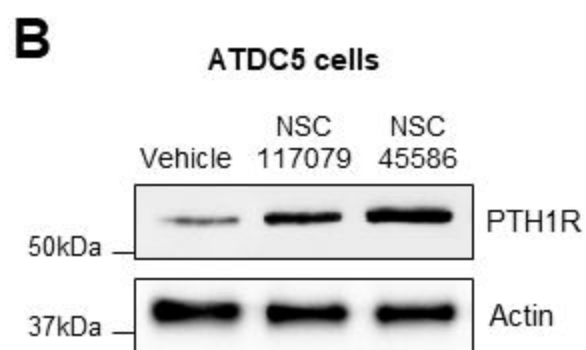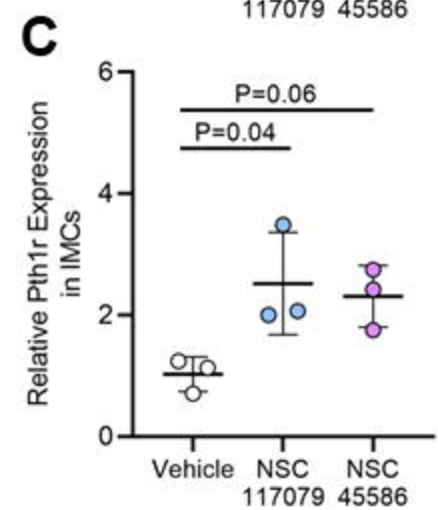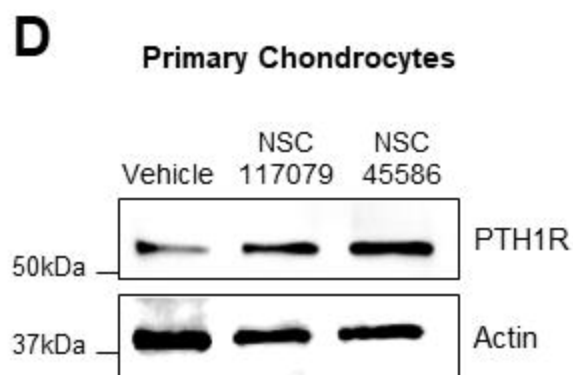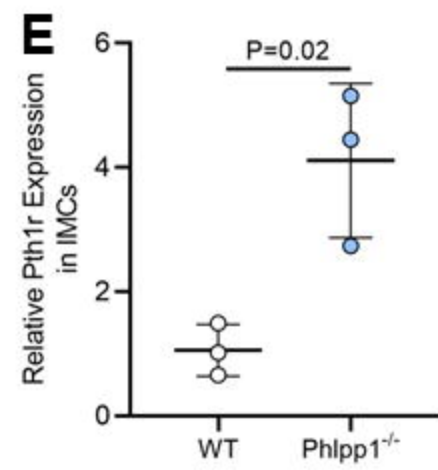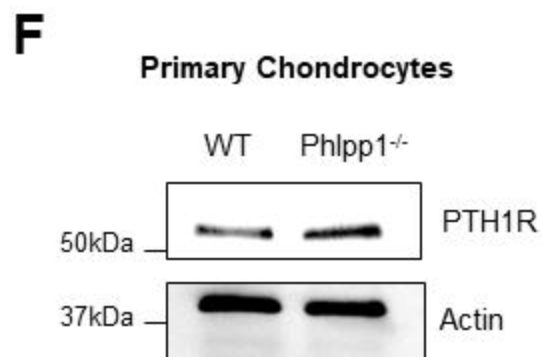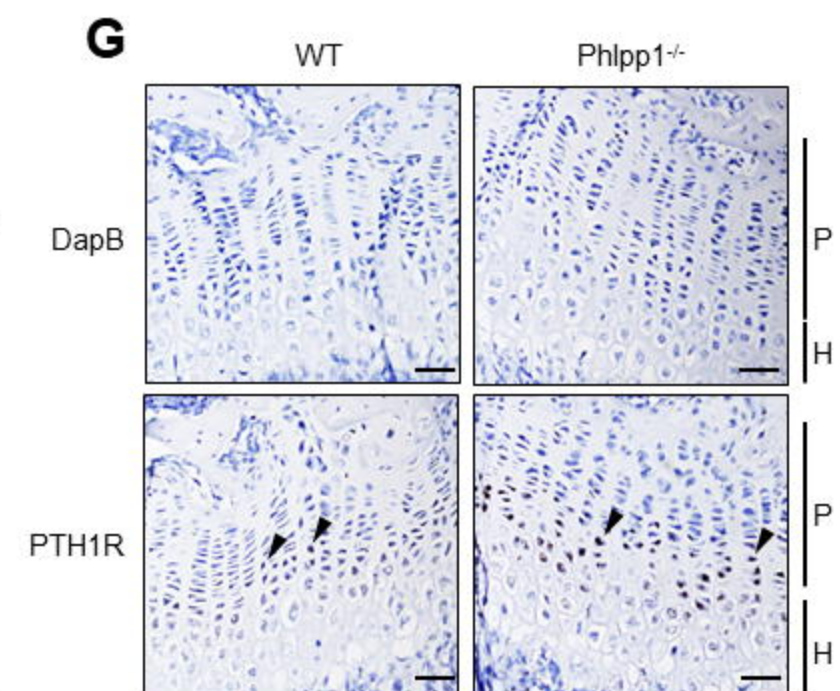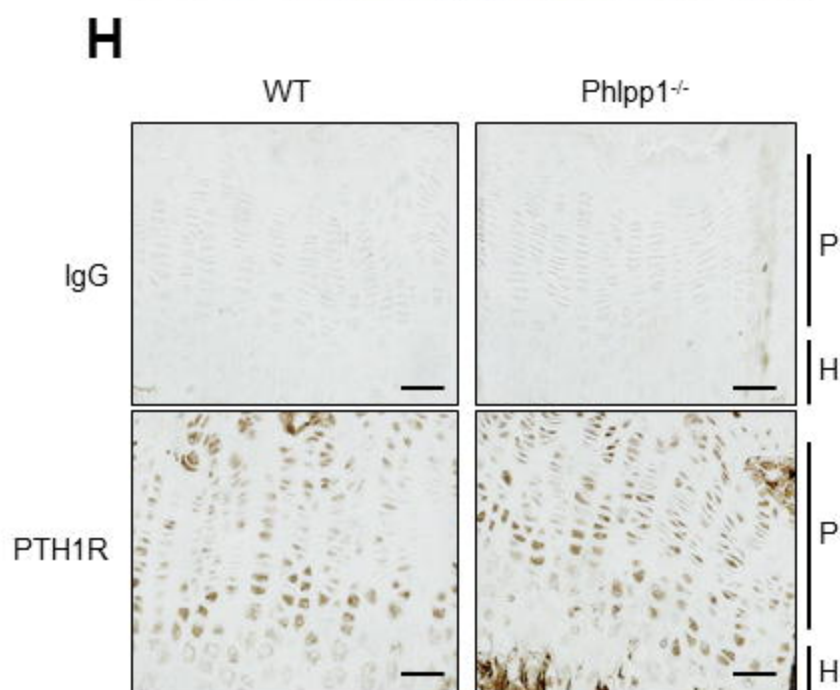

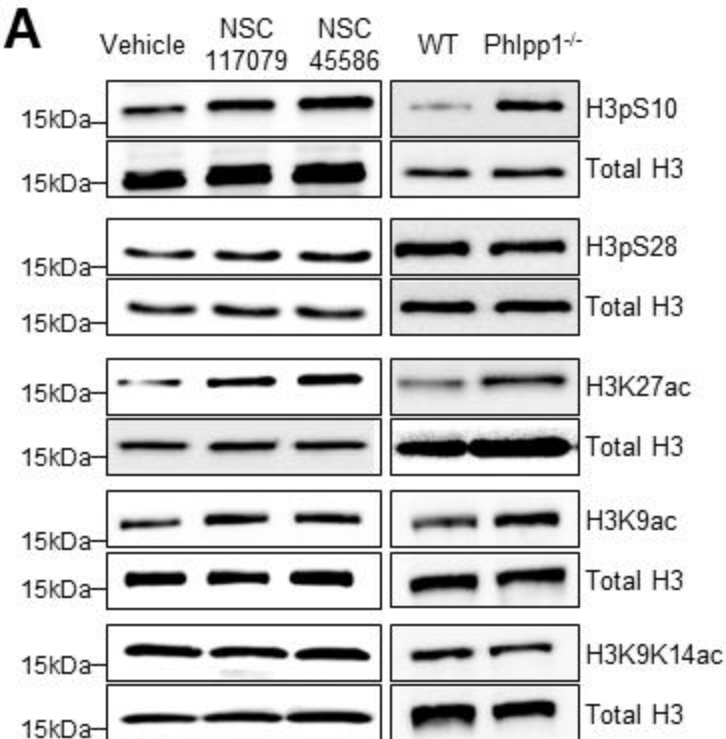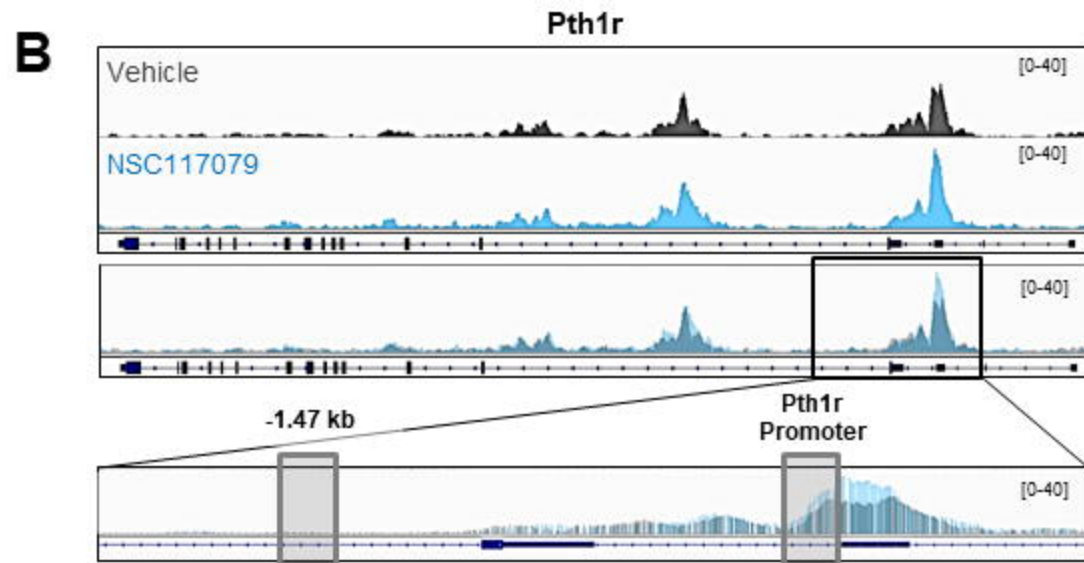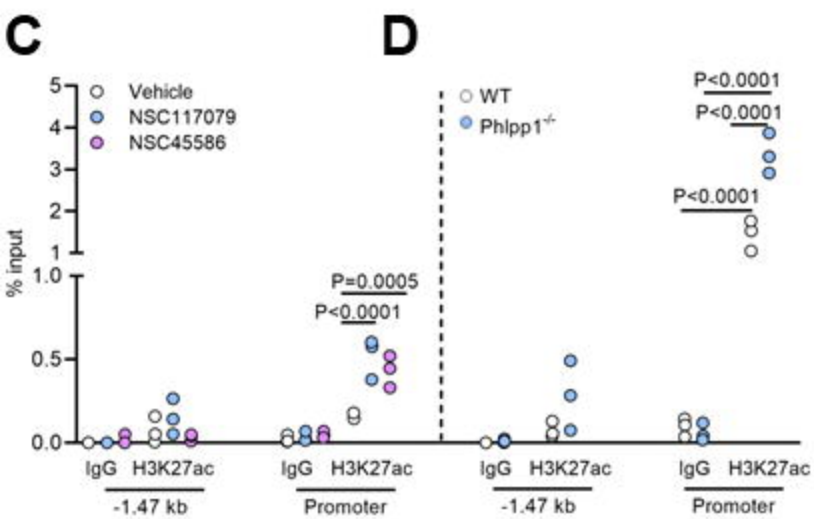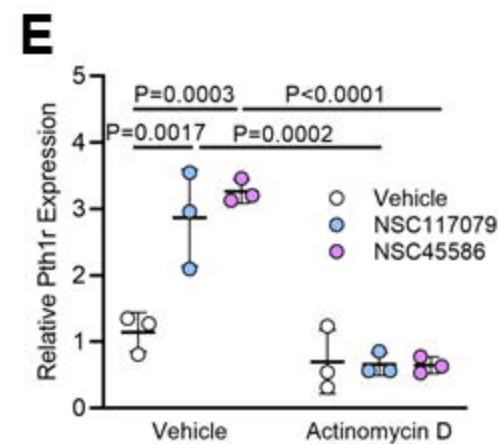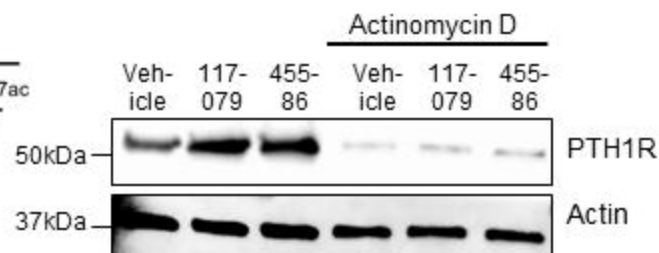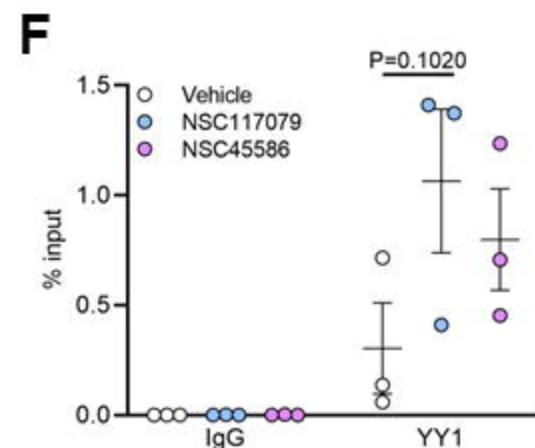



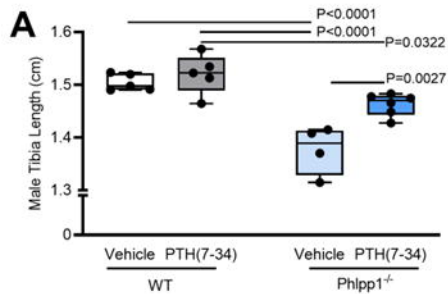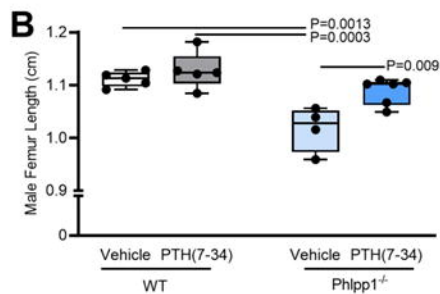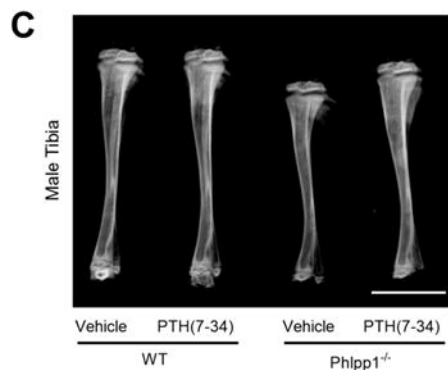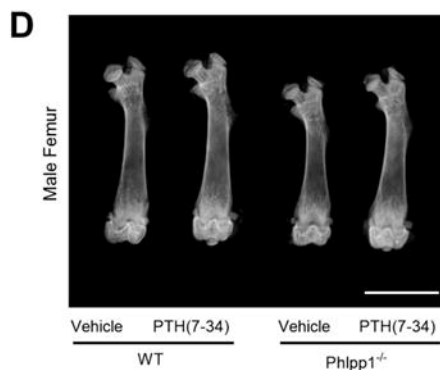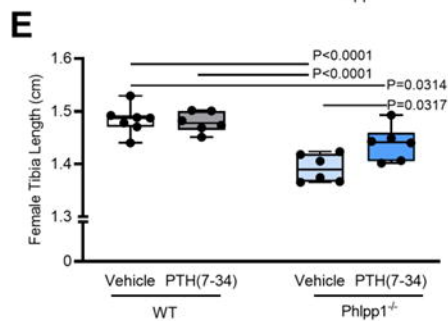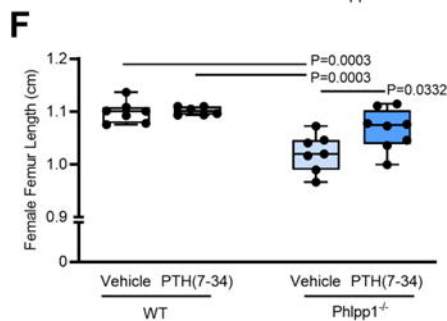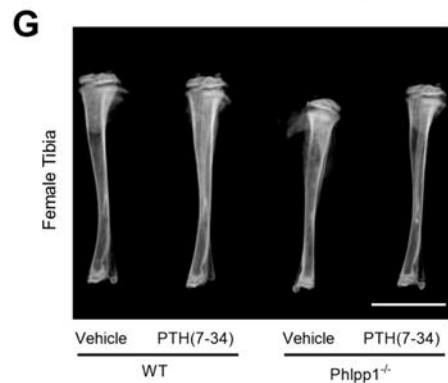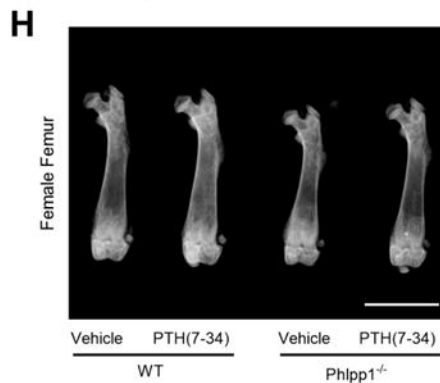

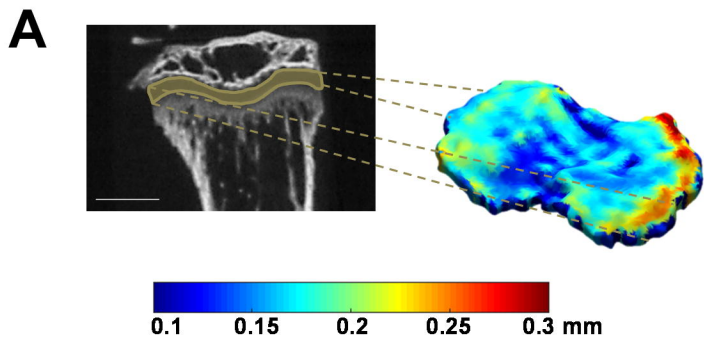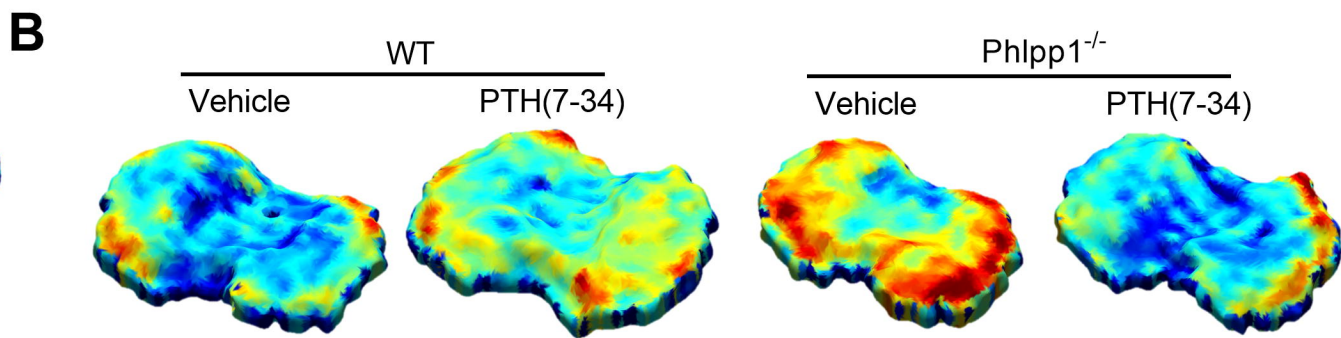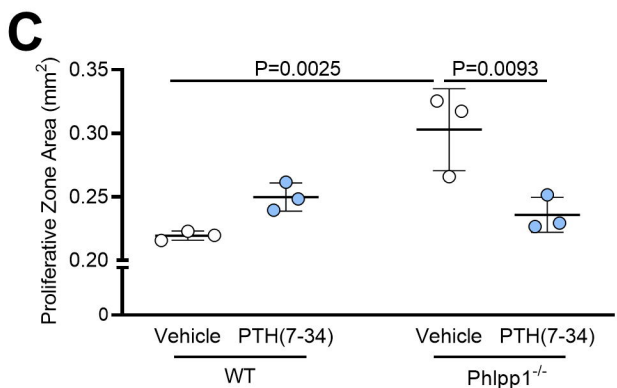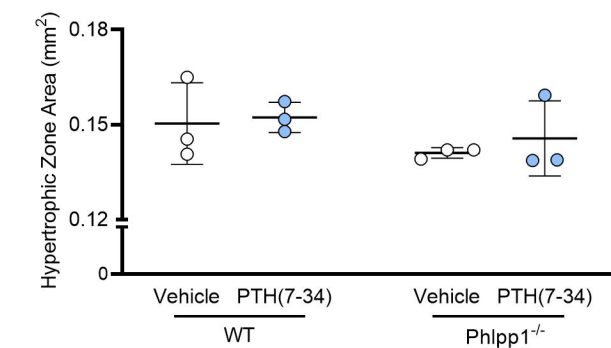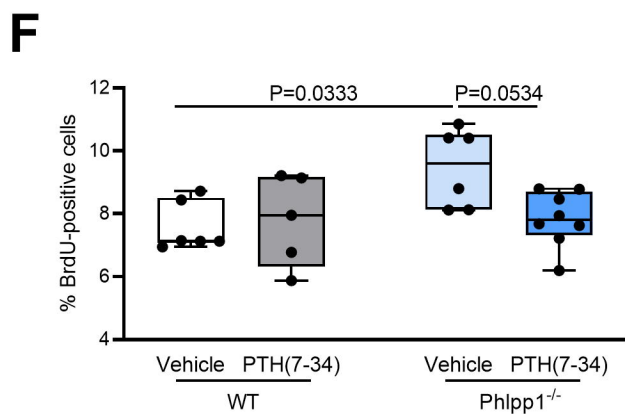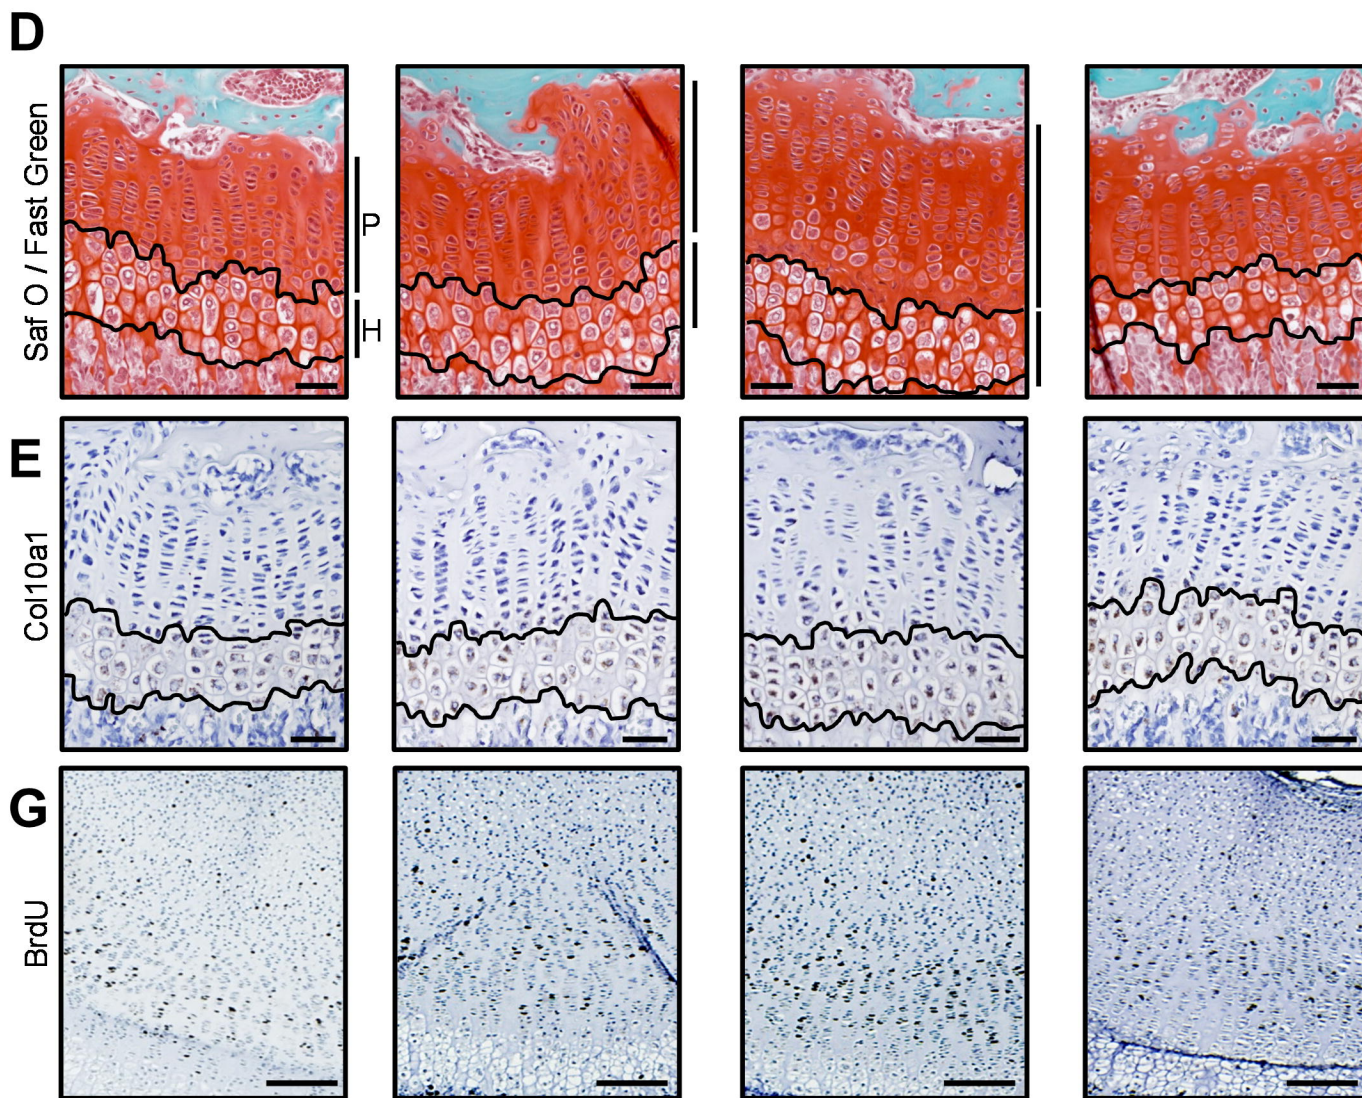

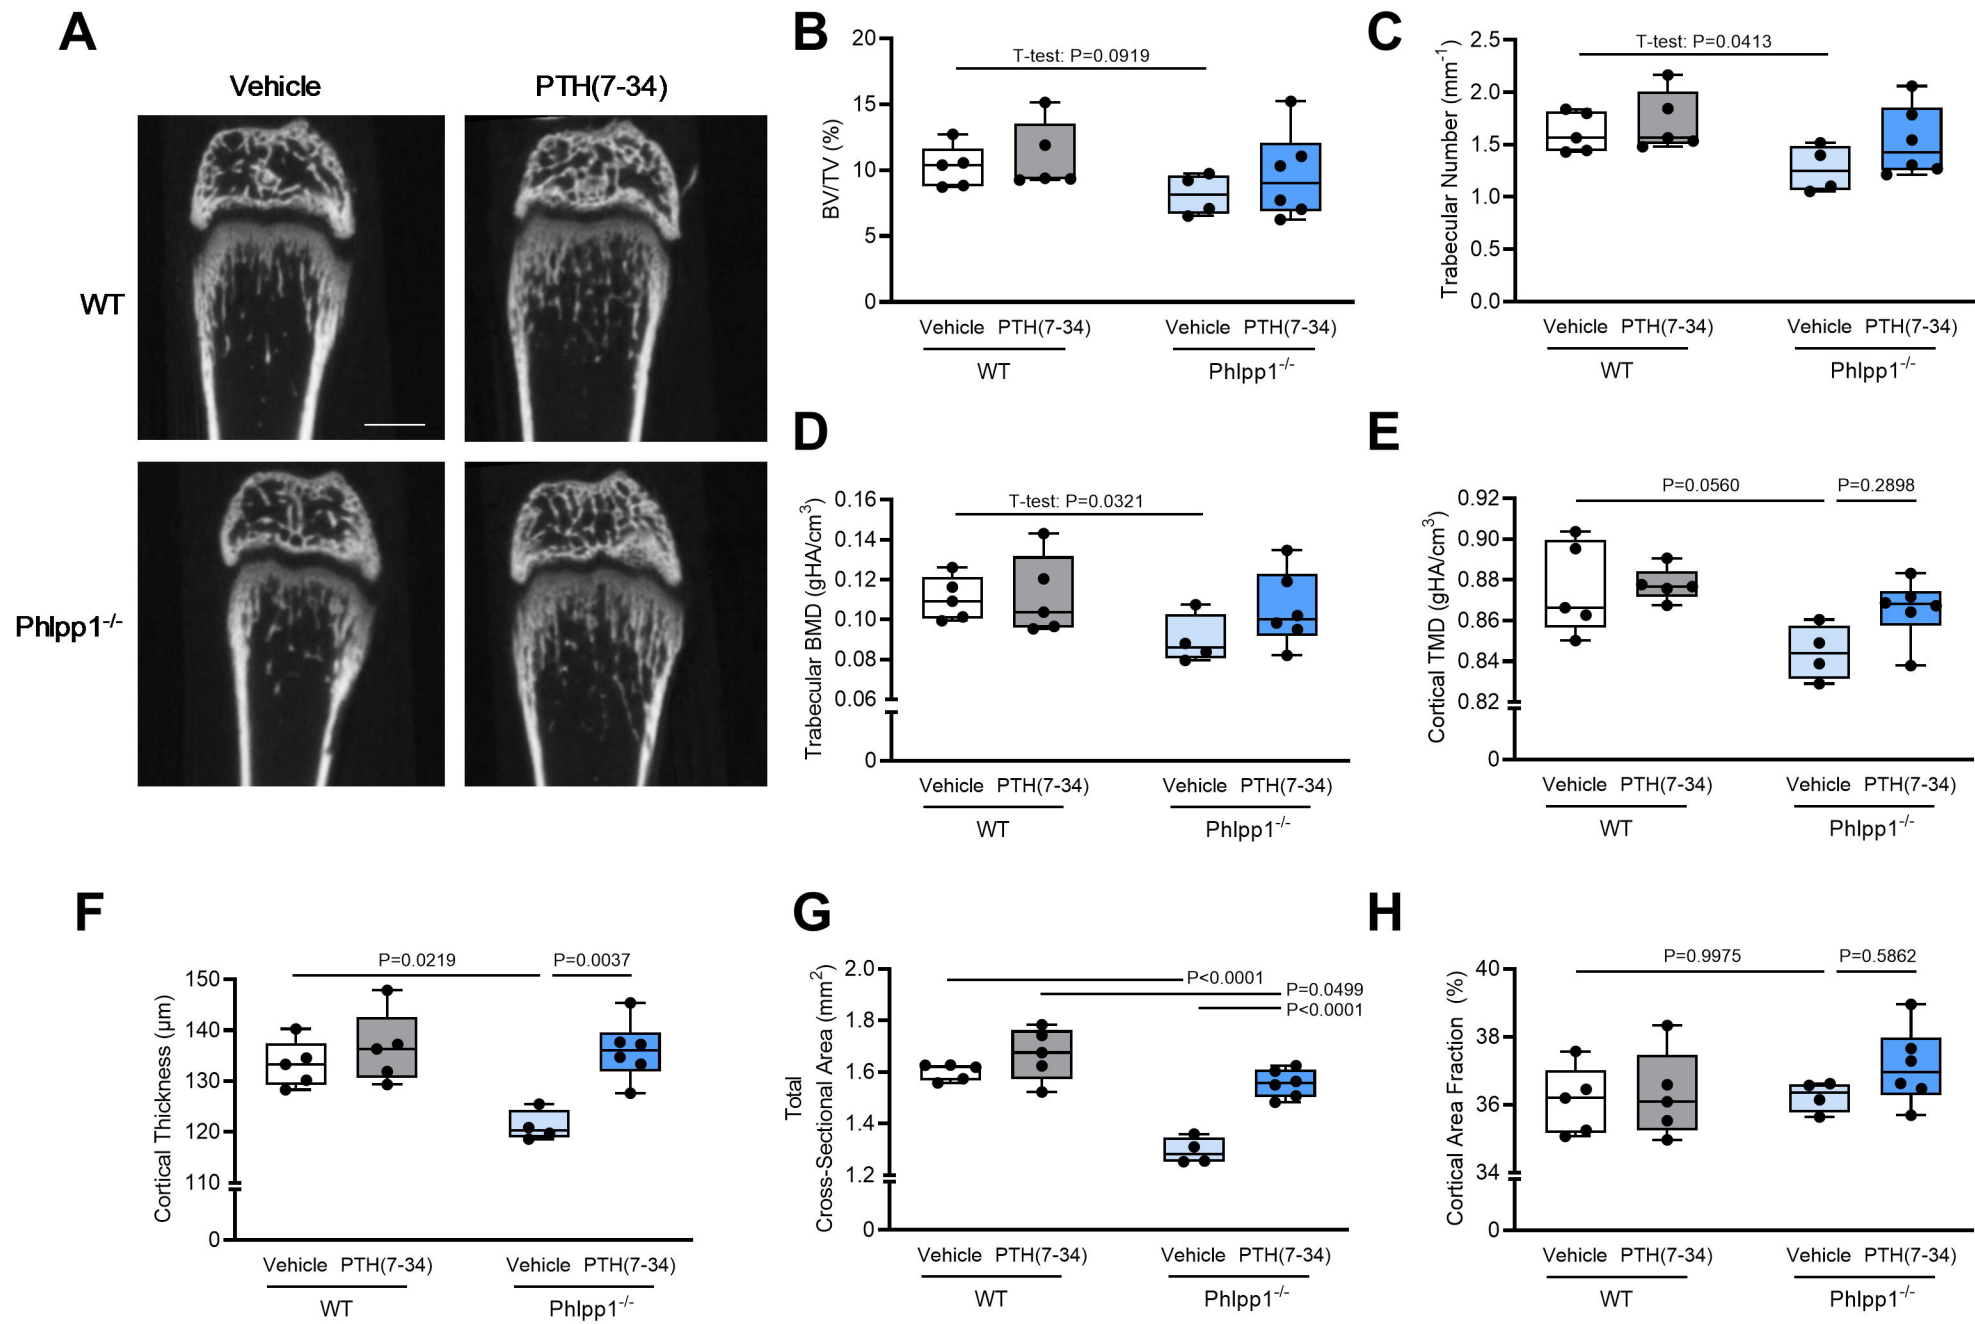



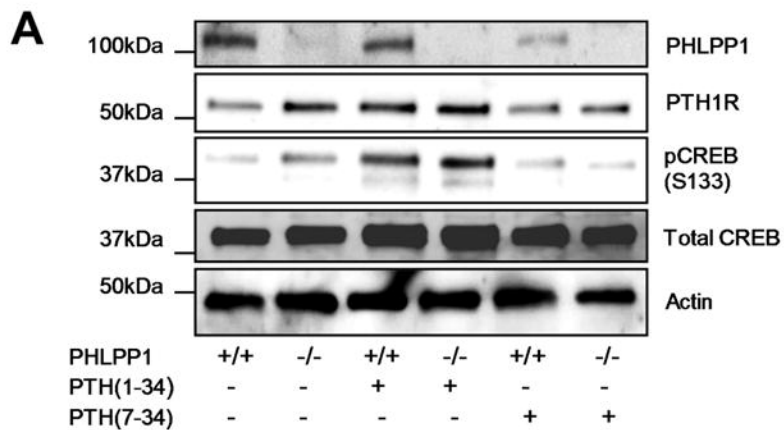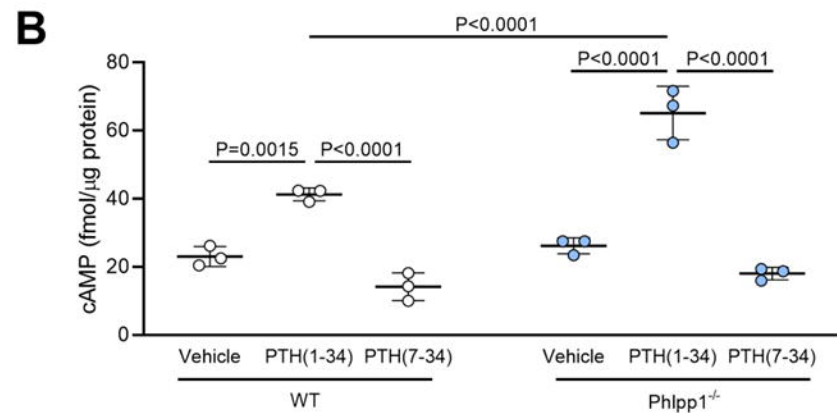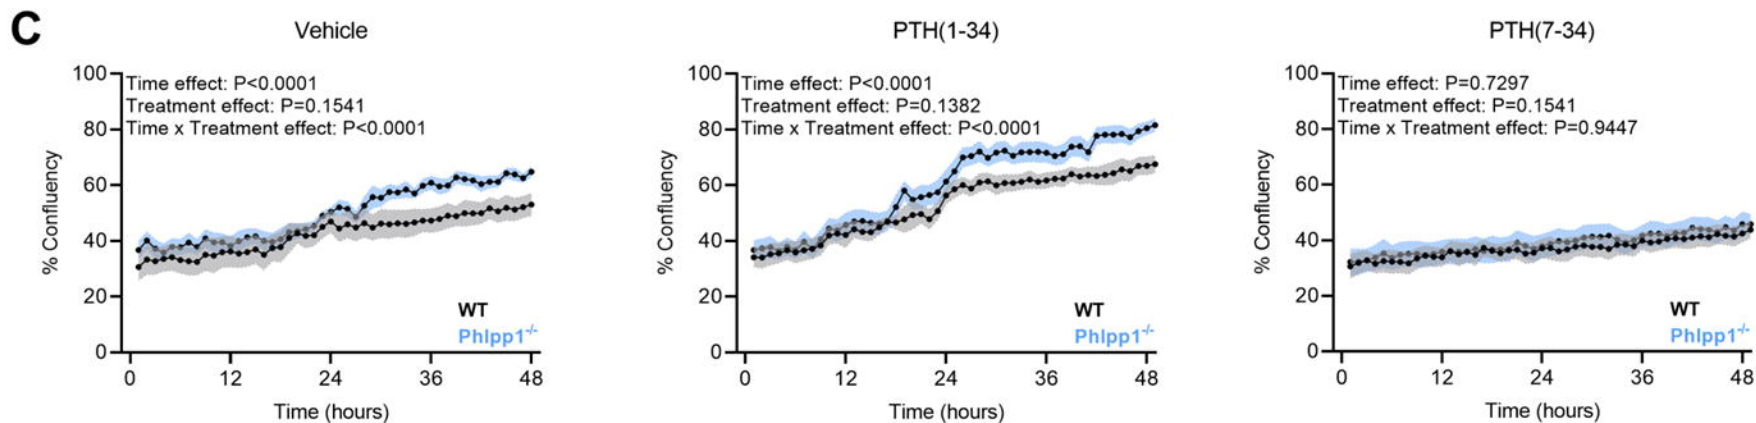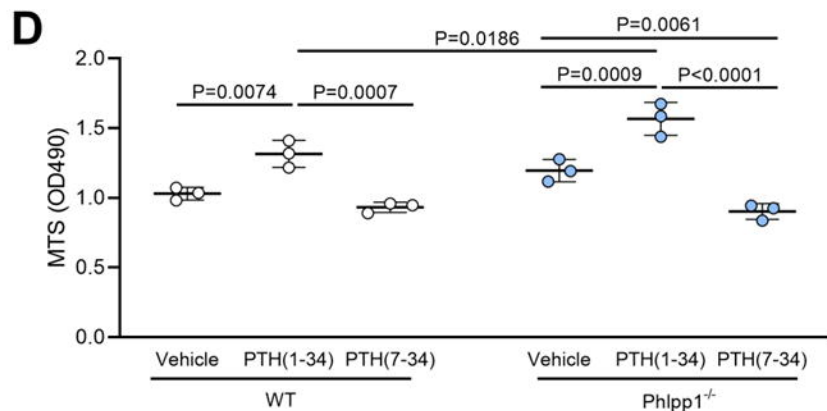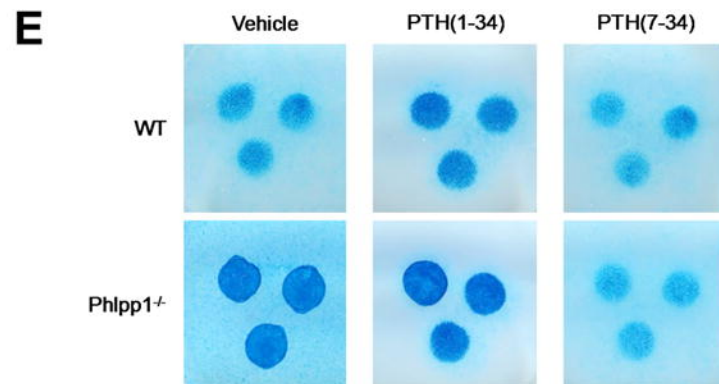

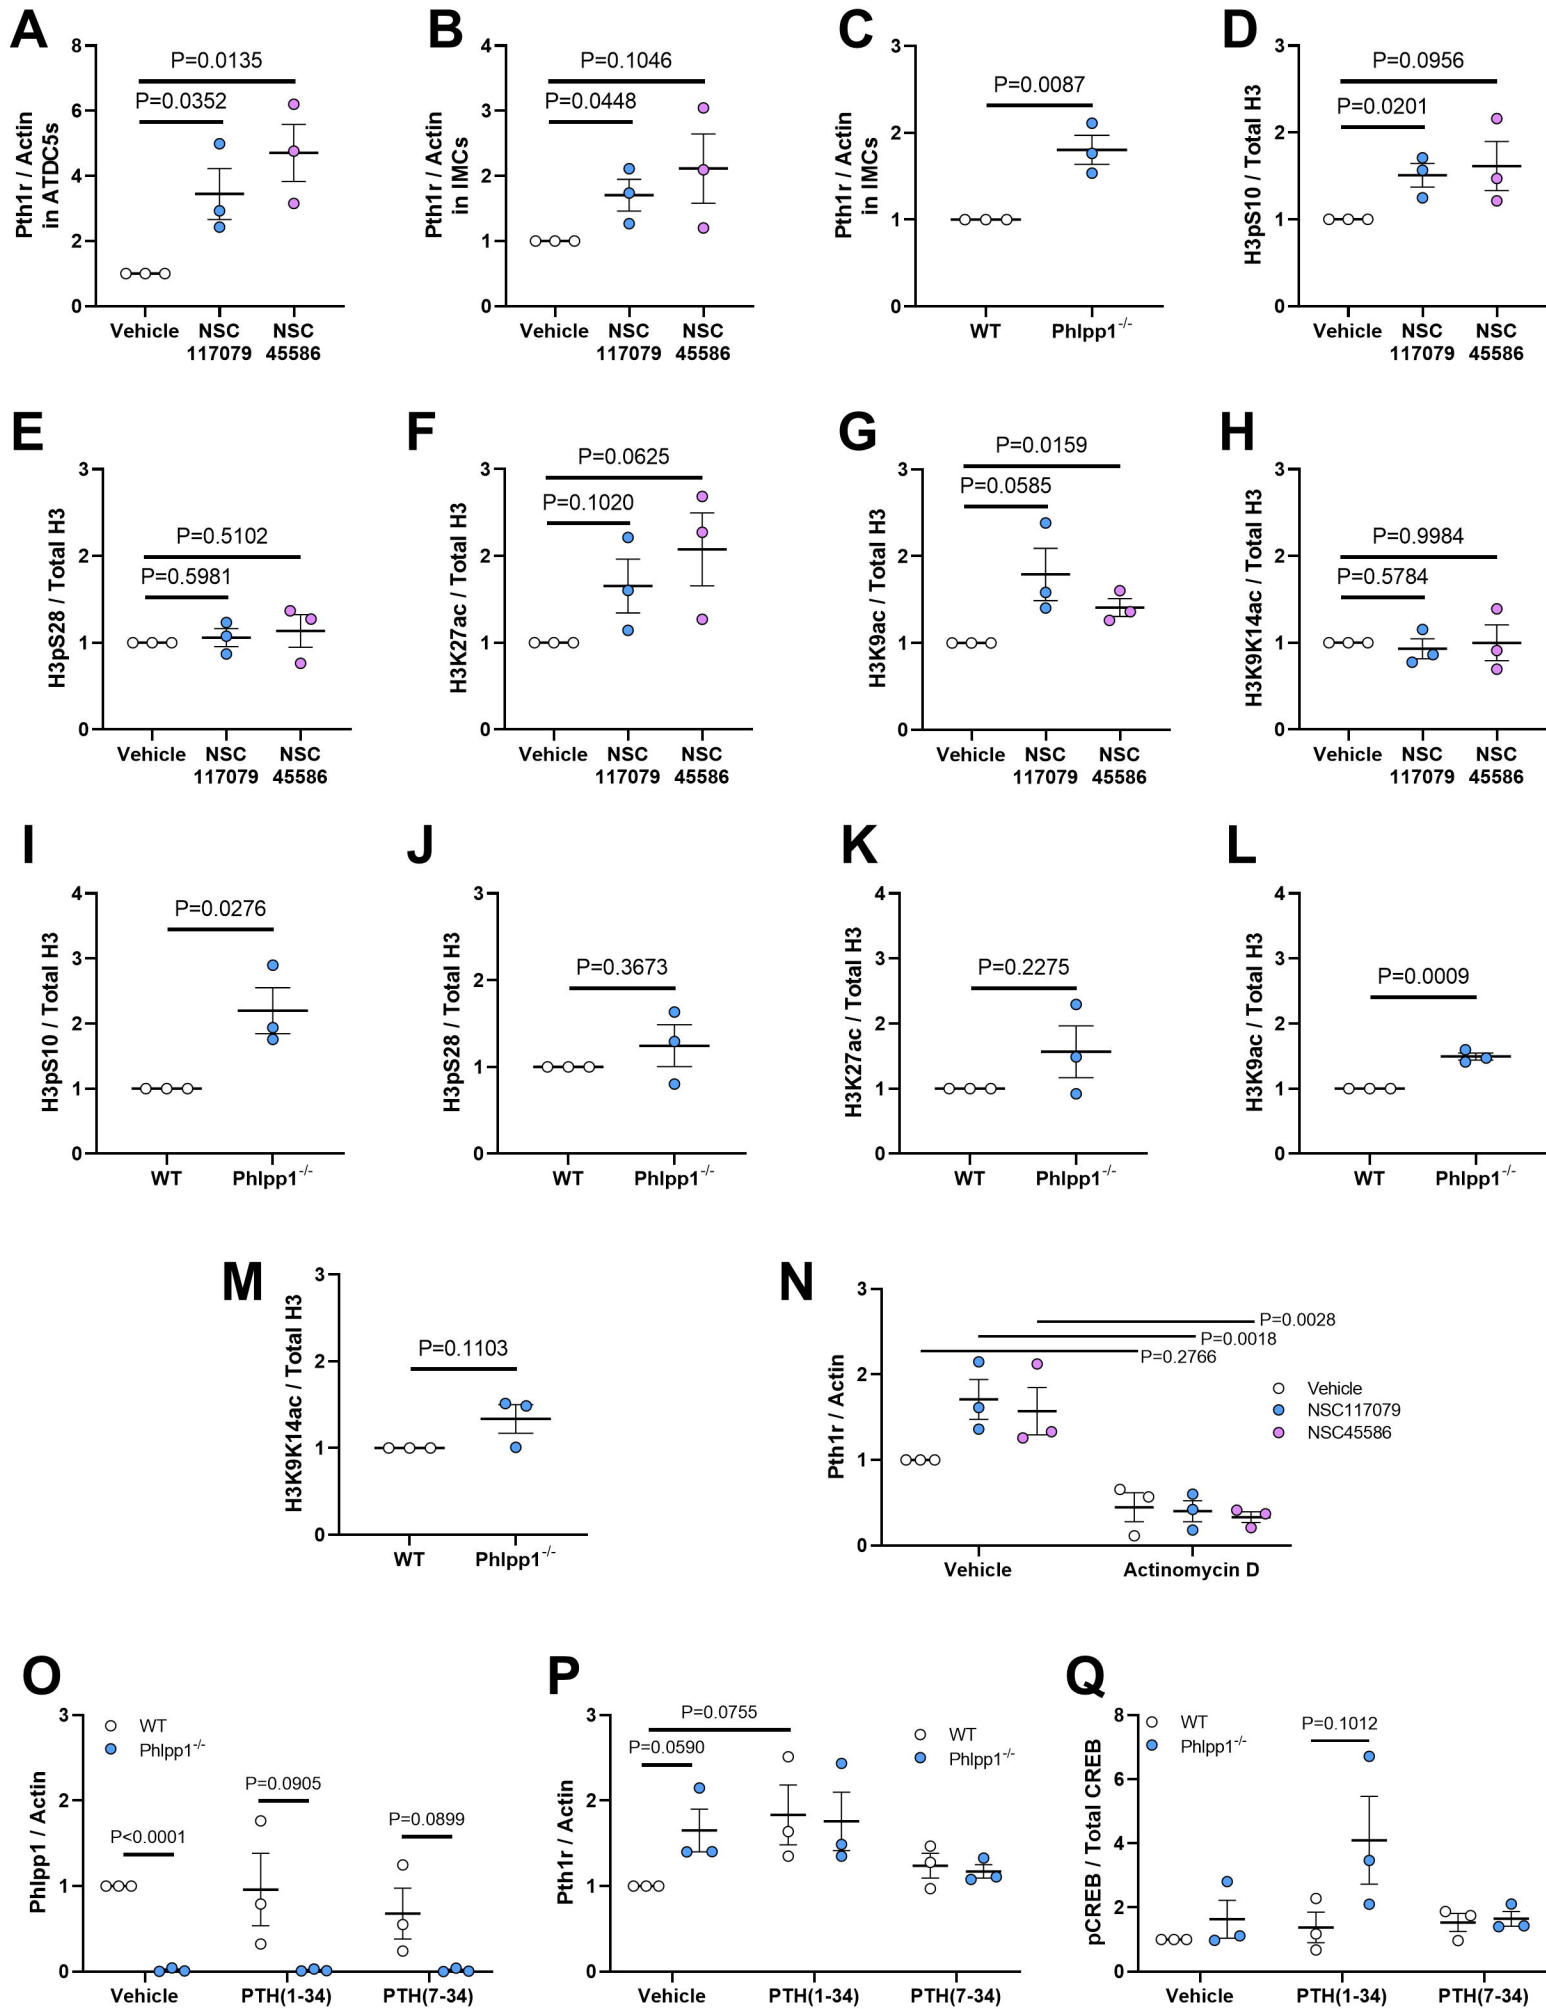



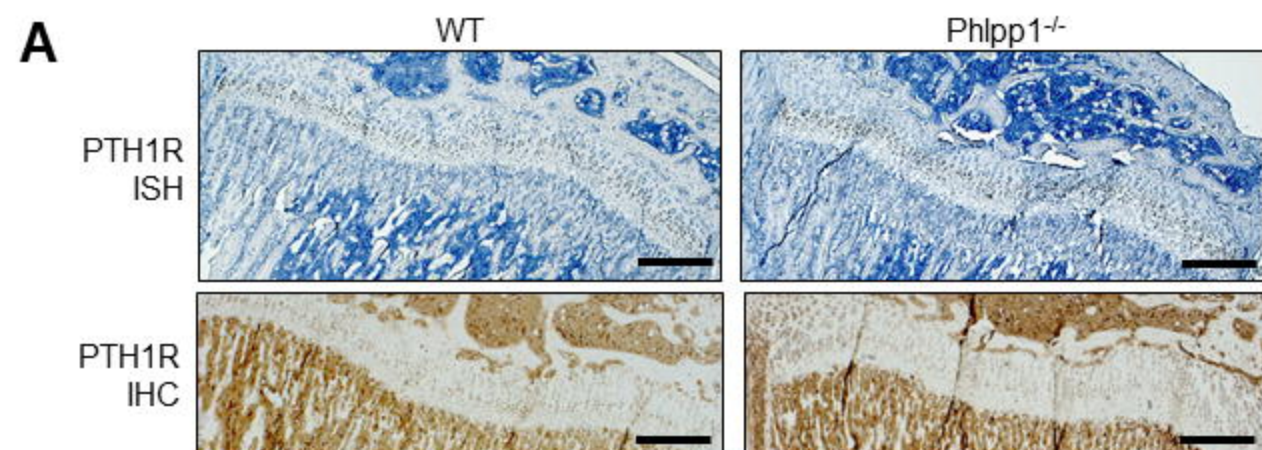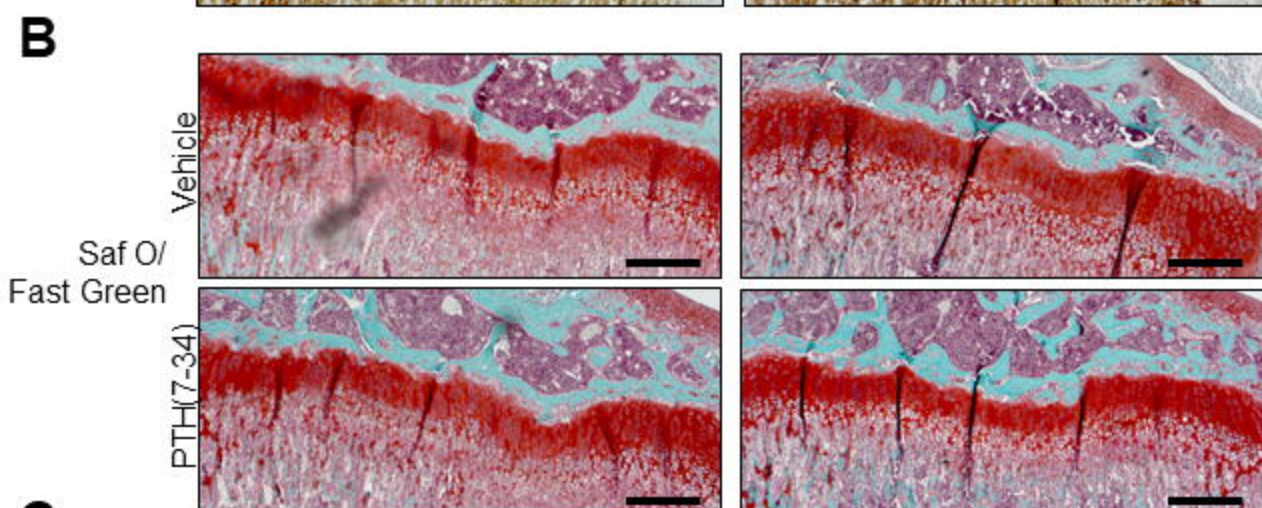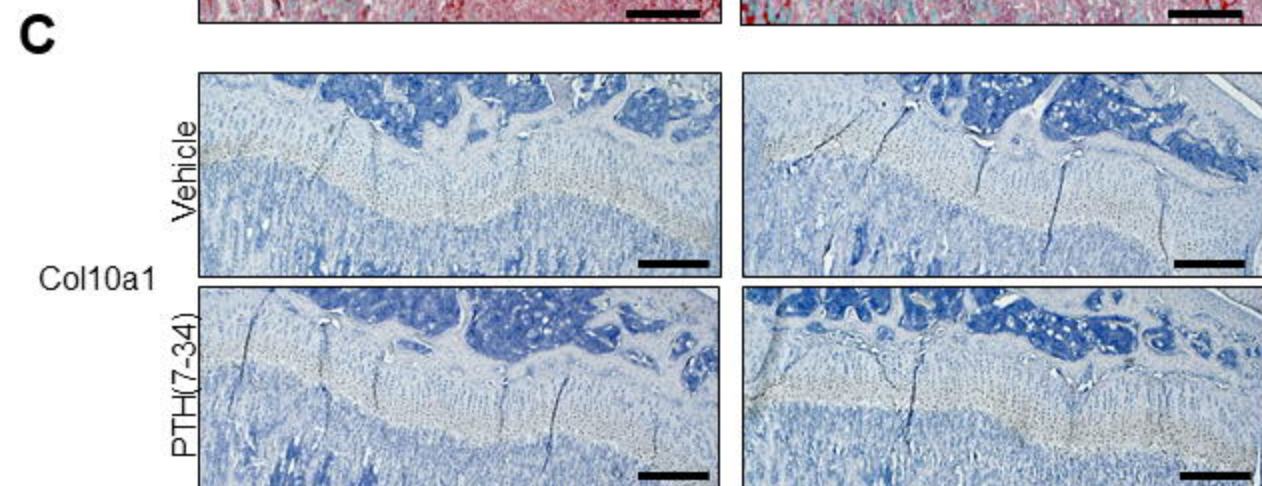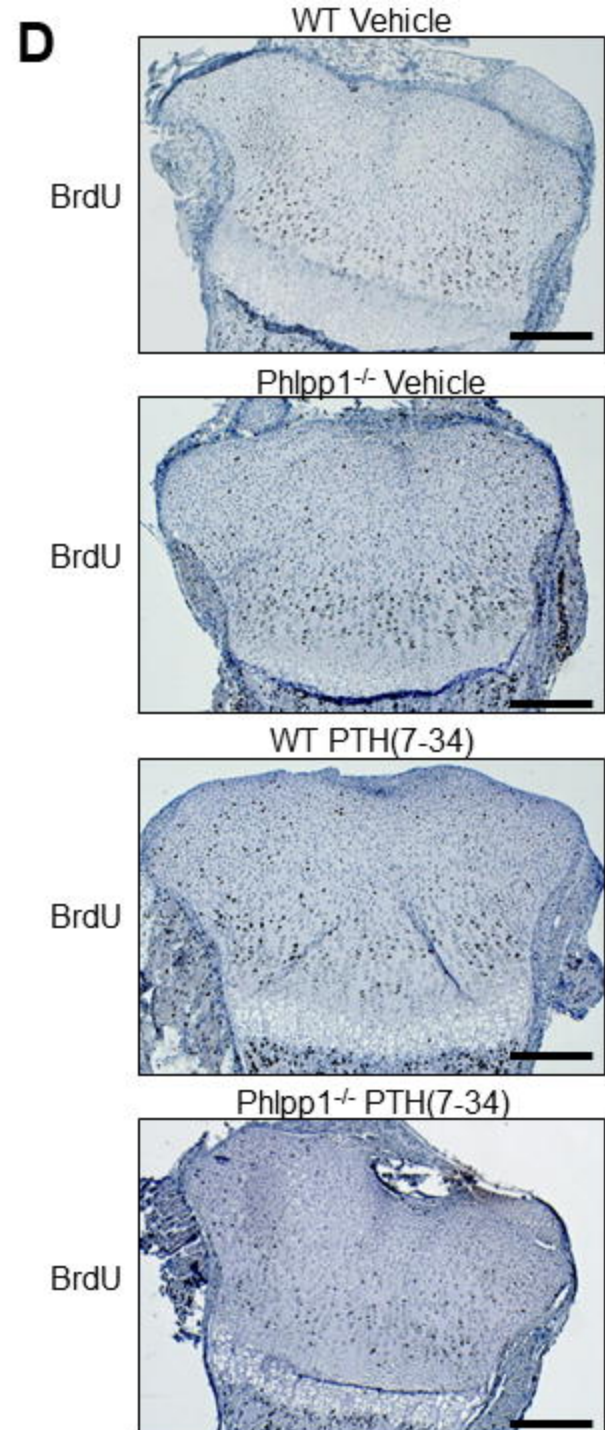

# Pth1r

Vehicle  
NSC117079

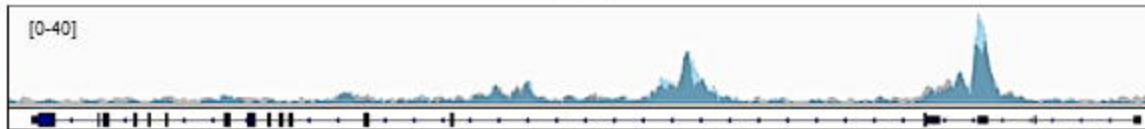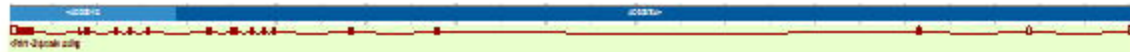

Limb E10.5

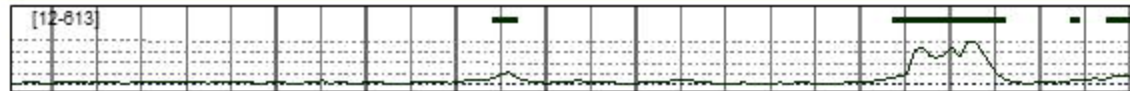

Limb E15.5

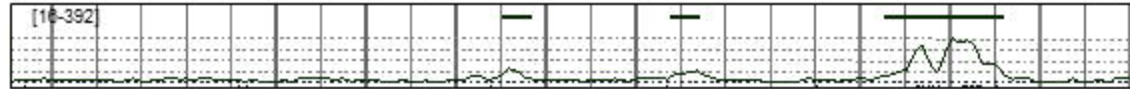

Ensembl Mus musculus version 100.38 (GRCm38.p6) Chr 9: 110,722,085 - 110,747,145

**A**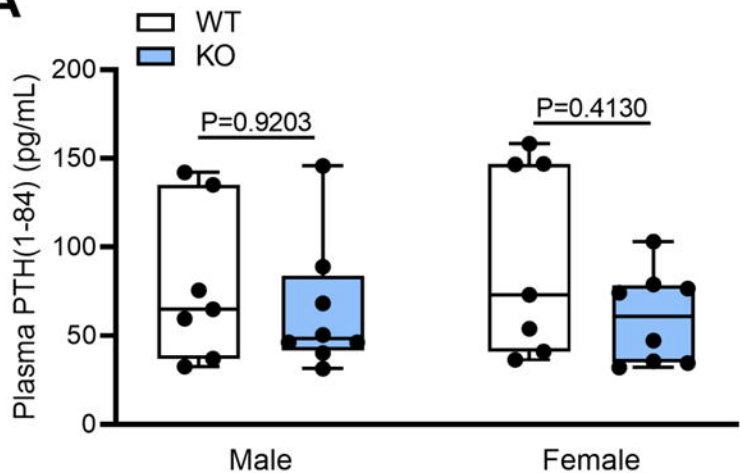**B**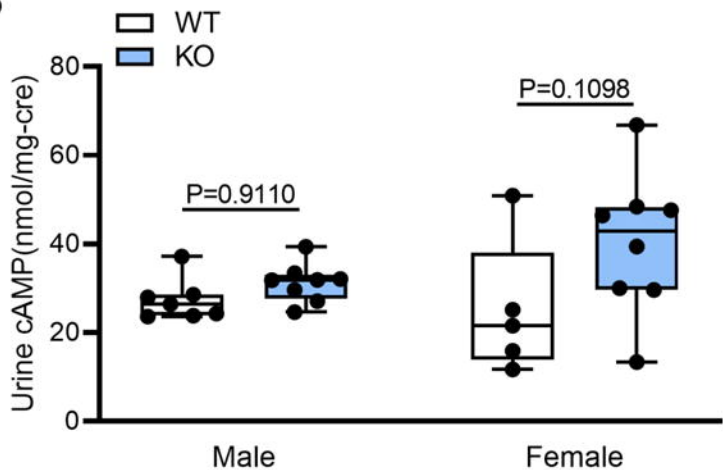



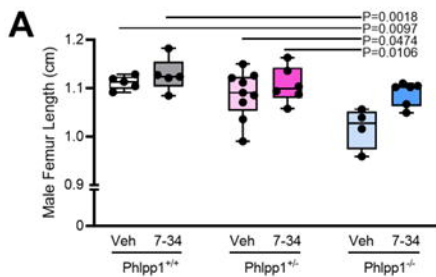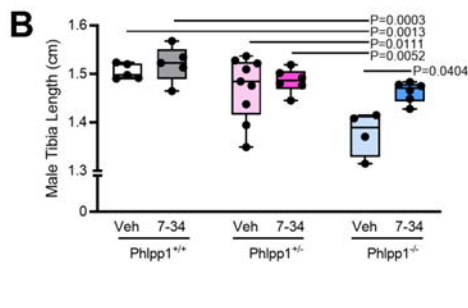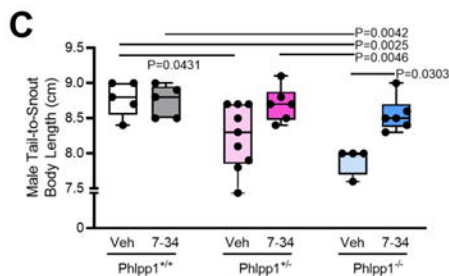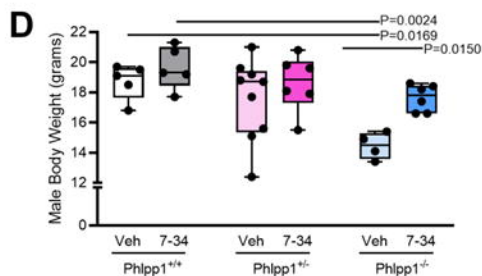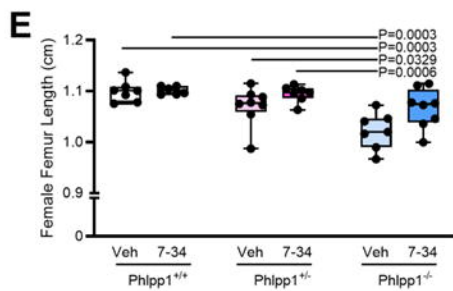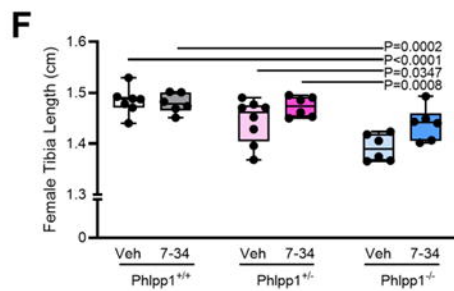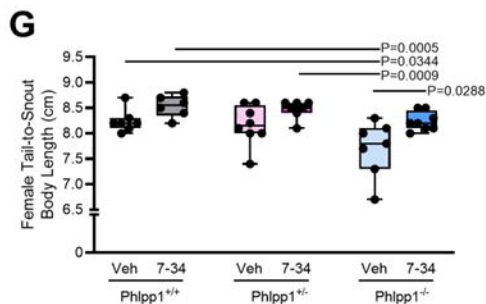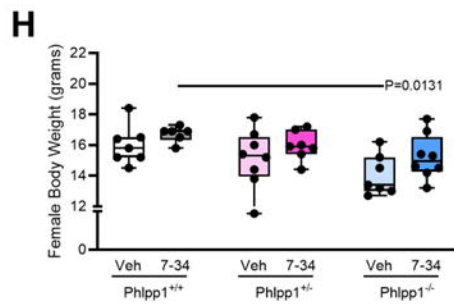

Male

Female

**A**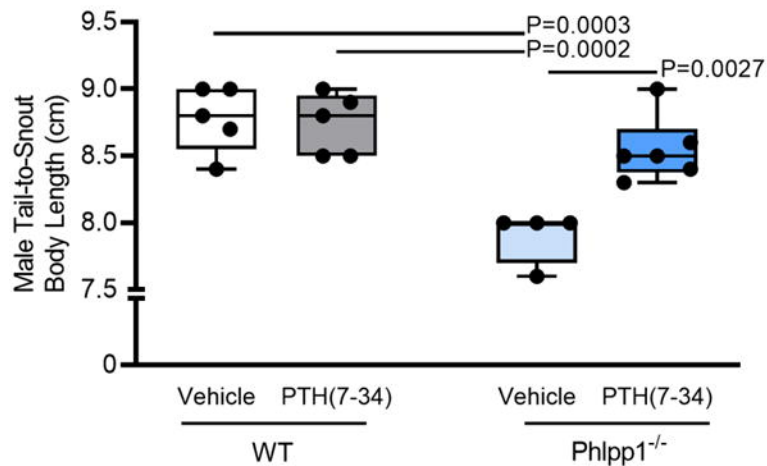**B**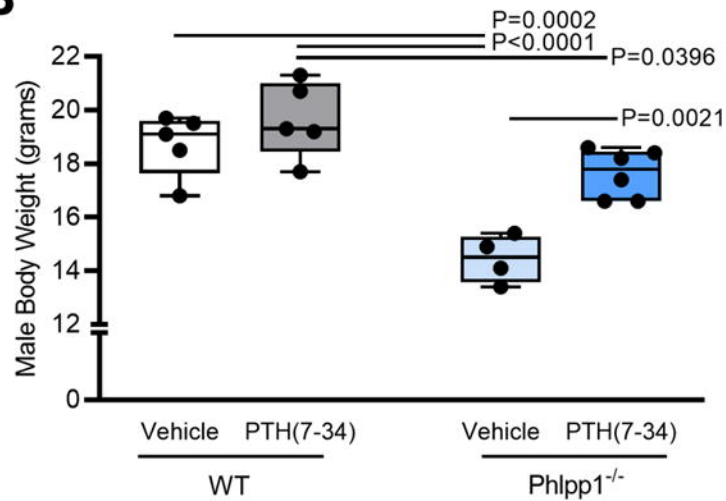**C**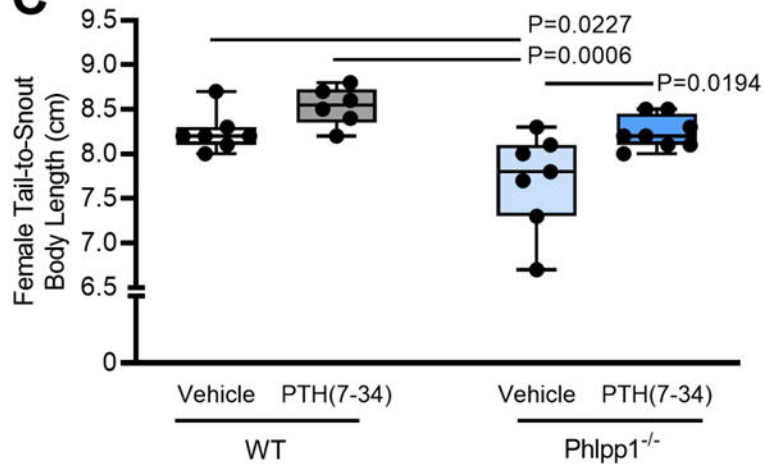**D**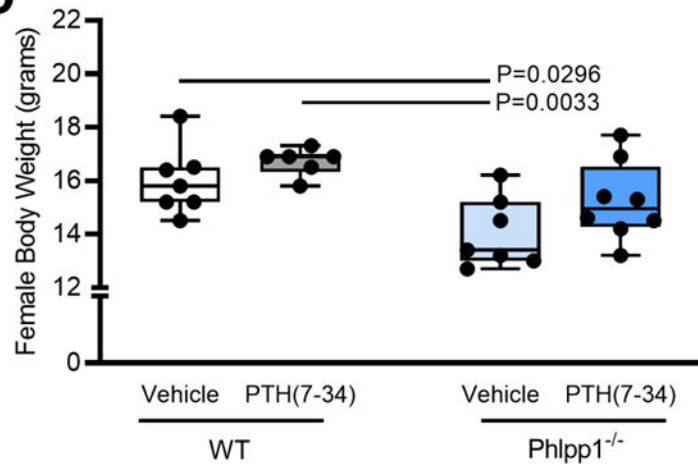

Source: https://www.biorxiv.org/content/10.1101/2020.12.06.413567v1.full.pdf
